1 **Brown adipocyte NOSEMPE promotes nonmitochondrial thermogenesis and**  
2 **improves systemic metabolism through ATF4 activation**

3

4 Esther Paulo<sup>1</sup>, Yun Zhang<sup>1</sup>, Ruchi Masand<sup>1</sup>, Tony L. Huynh<sup>5</sup>, Youngho Seo<sup>5</sup>, Danielle L.  
5 Swaney<sup>2,3,4</sup>, Margaret Soucheray<sup>2,3,4</sup>, David Jimenez-Morales<sup>2,3,4,6</sup>, Nevan J. Krogan<sup>2,3,4</sup>,  
6 Biao Wang<sup>1,\*</sup>

7

8 <sup>1</sup> Cardiovascular Research Institute, Department of Physiology, University of California,  
9 San Francisco, San Francisco CA, 94158, USA

10 <sup>2</sup> Department of Cellular and Molecular Pharmacology, University of California, San  
11 Francisco, San Francisco, CA 94158, USA

12 <sup>3</sup> California Institute for Quantitative Biosciences, QBI, University of California, San  
13 Francisco, San Francisco, CA 94158, USA

14 <sup>4</sup> J. David Gladstone Institutes, San Francisco, CA 94158, USA

15 <sup>5</sup> Department of Radiology and Biomedical Imaging, University of California, San  
16 Francisco, CA 94143, USA

17 <sup>6</sup> Current address: Department of Medicine, Division of Cardiovascular Medicine,  
18 Stanford University, Stanford, CA 94305, USA

19

20 \*Corresponding Author

21 Biao Wang Ph.D.

22 University of California, San Francisco

23 Phone: 415-502-2023

24 Email: [biao.wang@ucsf.edu](mailto:biao.wang@ucsf.edu)

25 **Abstract**

26 Mitochondrial transcription factor A (Tfam)-mediated mtDNA maintenance and  
27 transcription, as well as leucine-rich PPR motif-containing protein (Lrprrc)-mediated  
28 mtRNA maturation and translation are essential steps of mtDNA-encoded electron  
29 transport chain (ETC) protein expression. ETC is essential for mitochondrial  
30 thermogenesis, the process of oxygen-dependent heat production inside the  
31 mitochondria in brown adipocytes. Here we describe that Tfam or Lrprrc deficiency in  
32 brown adipocytes cause non-synchronized ETC mRNA and protein expression  
33 (NOSEMPE) and mitochondrial ETC imbalance, ultimately abolish mitochondrial  
34 thermogenesis. However, mice with NOSEMPE in brown adipocytes are cold resistant  
35 upon an acute 4°C cold challenge, because of augmented nonmitochondrial  
36 thermogenesis driven by the “NOSEMPE→ATF4→proteome turnover” pathway.  
37 Importantly, mice with either NOSEMPE or ATF4 overexpression in brown adipocytes are  
38 protected against high-fat-diet-induced metabolic abnormalities, indicating a positive  
39 association between nonmitochondrial thermogenesis in brown adipocytes and metabolic  
40 fitness. Thus, although brown adipocytes are defined by their unique ability to produce  
41 heat through mitochondrial respiration, our study demonstrates a novel cytosolic  
42 nonmitochondrial thermogenesis in brown adipocytes. Targeting this ATF4-dependent  
43 nonmitochondrial thermogenesis in brown adipocytes may represent a new therapeutic  
44 strategy for combating metabolic disorders.

45 Energy balance requires equivalent energy intake from food and energy expenditure for  
46 basal metabolism, physical activity and adaptive thermogenesis. The adaptive  
47 thermogenesis refers to the heat production in response to environmental changes, which  
48 mainly occurs in brown adipose tissue (BAT) containing specialized mitochondria-rich  
49 brown adipocytes<sup>1,2</sup>. Brown fat depots in humans have been recognized using 18F-  
50 fluoro-deoxyglucose positron emission tomography (<sup>18</sup>F-FDG PET) with computer-  
51 assisted tomography (CT), due to their higher glucose uptake activity. Particularly, brown  
52 fat <sup>18</sup>F-FDG uptake activity gradually declines with aging and metabolic diseases<sup>3-6</sup>.  
53 Thus, increasing brown fat abundance to boost adaptive thermogenesis has been  
54 proposed as a therapeutic strategy to offset the positive energy balance and to improve  
55 metabolic health in humans<sup>7,8</sup>.

56  
57 The cold-induced adaptive thermogenesis (CIT), also called  $\beta$ AR-induced adaptive  
58 thermogenesis, is a primary source of heat production from brown adipocytes upon cold  
59 stimulation, which requires mitochondrial respiration and uncoupling protein 1 (Ucp1)-  
60 mediated uncoupling<sup>1,9</sup>. Numerous studies centered on cAMP- and peroxisome  
61 proliferator-activated receptor gamma coactivator 1- (PGC1-) dependent mitochondrial  
62 biogenesis have demonstrated that mitochondrial quantity control in brown adipocytes  
63 determines their thermogenic capacity<sup>9-11</sup>.

64  
65 Both nuclear DNA and mitochondrial DNA (mtDNA) encode subunits of electron transport  
66 chain (ETC); thus, the synchronization of nuclear- and mtDNA-encoded ETC protein  
67 expression is essential for mitochondrial respiration and then  $\beta$ AR-induced adaptive

68 thermogenesis in brown adipocytes<sup>12-14</sup>. We have recently described that brown  
69 adipocyte-specific mitochondrial transcription factor A (Tfam) knockout mice (Tfam<sup>BKO</sup>)  
70 exhibit a paradoxical trade-off between mitochondria-fueled  $\beta$ AR-induced adaptive  
71 thermogenesis and systemic metabolism in mice<sup>15</sup>. In this study, we further demonstrate  
72 that disrupting mitochondrial quality (by the non-synchronized ETC mRNA and protein  
73 expression, abbreviated as NOSEMPE) in brown adipocytes induces an ATF4-dependent  
74 nonmitochondrial thermogenesis that is instead fueled by proteome turnover in the  
75 cytosol. This nonmitochondrial thermogenesis in brown adipocytes can contribute to  
76 organismal thermoregulation under acute cold stress and promote metabolic health,  
77 which unveils a new function of brown adipocytes in systemic thermoregulation and  
78 metabolism.

79

## 80 RESULTS

### 81 **Lrpprc regulates mtDNA ETC gene expression and mitochondrial respiration in** 82 **brown adipocytes**

83 Leucine-rich pentatricopeptiderepeat containing protein (LRPPRC) is a master regulator  
84 of mtDNA-encoded RNA maturation and stability (**Fig. 1a**)<sup>16-18</sup>, and LRPPRC mutations  
85 cause cytochrome c oxidase (complex IV) deficiency in the French-Canadian variant of  
86 Leigh syndrome<sup>19-21</sup>. We have generated the brown adipocyte-specific Lrpprc knockout  
87 (*Ucp1-Cre;Lrpprc<sup>fl/fl</sup>*, Lrpprc<sup>BKO</sup>) mice. Q-PCR and western blot confirmed that Lrpprc was  
88 efficiently deleted in the BAT of Lrpprc<sup>BKO</sup> mice and not in other tissues (**Supplementary**  
89 **Fig.1a, b**). BAT thermogenic genes *Ucp1* and *Dio2* were reduced in these mice, although  
90 *Ucp1* protein levels were not altered (**Supplementary Fig.1c, d**). Lrpprc deficiency

91 induced “whitening” of brown adipocytes at room temperature (RT) (**Fig.1b**). But both  
92 wild-type and *Lrrprc*-deficient brown adipocytes exhibited unilocular morphology  
93 uniformly at thermoneutrality (30°C) (**Fig.1b**), where mitochondrial respiration in brown  
94 adipocytes is not needed for organismal thermoregulation.

95

96 As we expected, steady-state mRNA levels of most mtDNA-encoded genes were reduced  
97 in the BAT of *Lrrprc*<sup>BKO</sup> mice, without significant changes in nuclear-encoded ETC genes  
98 or mtDNA copy numbers (**Fig.1c, Supplementary Fig.1e**). This specific reduction of  
99 mtDNA-encoded ETC genes was also observed in the BAT of *Lrrprc*<sup>BKO</sup> mice housed at  
100 30°C (**Fig.1c**). Immunoblots further confirmed that mtDNA-encoded complex IV proteins,  
101 mtCo1 and mtCo2, were reduced in isolated BAT mitochondria from *Lrrprc*<sup>BKO</sup> mice  
102 (**Fig.1d, Supplementary Fig.2g**). Interestingly, nuclear-encoded complex IV subunits,  
103 such as Cox4, Cox5b and Cox6b, were also reduced at both ambient temperatures, even  
104 though their mRNA levels were largely unaffected (**Fig.1c, d**). In contrast, Atp5a (complex  
105 V), Uqcrc2 (complex III), Sdhb (complex II) and Ndufb8 (complex I) protein levels remain  
106 unaffected (**Supplementary Fig.2g**).

107

108 In order to obtain a global view of their mitochondrial proteome, we performed mass  
109 spectrometry analysis of freshly isolated BAT mitochondria from control and *Lrrprc*<sup>BKO</sup>  
110 mice at normal chow housed at both RT and 30°C. We identified approximately 670  
111 mitochondrial proteins for further analyses (**Supplementary Fig.2a-c, Supplementary**  
112 **Table 1**). The mass spectrometry analysis of mitochondrial proteome did not reveal

113 profound metabolic reprogramming in *Lrrprc*-deficient brown adipocytes, including the  
114 enzymes involved in glycolysis, TCA cycle and beta-oxidation, except for the upregulation  
115 of *Acot2* (**Supplementary Fig.2f**). *Lrrprc* deficiency did cause similar changes in  
116 mitochondrial ETC proteome at both RT and 30°C. Gene Ontology enrichment analysis  
117 showed that mitochondrial respiratory chain, NADH dehydrogenase (complex I) and  
118 cytochrome C oxidase (complex IV) activities were the most affected by *Lrrprc* deficiency  
119 at both ambient temperatures (**Supplementary Fig.2d, e**). The complex IV enzyme  
120 activity *in vitro* was attenuated in the BAT of *Lrrprc*<sup>BKO</sup> mice (**Fig.1f**). To quantitate the  
121 BAT ETC proteome, we calculated the average log<sub>2</sub> fold change (log<sub>2</sub>FC) values for all  
122 complex proteins identified and we found that complex IV was the most affected (**Fig.1e**),  
123 suggesting that an ETC proteome imbalance is induced by *Lrrprc* deficiency in brown  
124 adipocytes.

125

126 Previously we reported the BAT mitochondrial proteome in brown adipocyte-specific *Lkb1*  
127 and *Tfam* knockout mice (*Lkb1*<sup>BKO</sup> and *Tfam*<sup>BKO</sup>)<sup>15</sup>. Clustering analysis showed that the  
128 mitochondrial proteomic changes induced by *Tfam* or *Lrrprc* deficiency were similar  
129 (**Supplementary Fig.2h**). Comparing the BAT mitochondrial proteome in *Tfam*<sup>BKO</sup> and  
130 *Lrrprc*<sup>BKO</sup> mice, we found that proteins involved in mitochondrial protein import (*Timm10*,  
131 *Pam16*, and *Dnajc15*) and proteases (*Afg3l1*, *Afg3l2* and *Lonp1*) were selectively  
132 upregulated (**Supplementary Fig.2i**), suggesting that *Lrrprc* or *Tfam* deficiency induces  
133 a similar mitochondrial proteome remodeling in response to ETC proteome imbalance.

134

135 **NOSEMPE in brown adipocytes induces a nonmitochondrial thermogenesis**

136 BAT adaptive thermogenesis is essential for organismal thermoregulation in rodents <sup>1,2</sup>.  
137 Genetic ablation of BAT in mice leads to increased cold sensitivity in an acute 4°C cold  
138 tolerance test (CTT) <sup>22,23</sup>, a rapid decrease of core body temperature (~10°C decrease  
139 within several hours). Impaired mitochondrial biogenesis (in *Gnas*<sup>BKO</sup> and betaless mice  
140 <sup>24,25</sup>) or *Ucp1* deficiency (in *Ucp1* knockout mice <sup>26</sup>) in brown adipocytes also causes  
141 defective  $\beta$ AR-induced adaptive thermogenesis and increased cold sensitivity in CTT.  
142 Since mitochondrial respiration fuels  $\beta$ AR-induced adaptive thermogenesis in BAT <sup>1</sup>, we  
143 then used indirect calorimetry experiments to measure  $\beta$ AR-induced adaptive  
144 thermogenesis, as well as basal energy expenditure (EE, calculated from oxygen  
145 consumption), respiratory exchange ratio (RER), food intake and physical activity of 8-  
146 10-week-old male control and *Lrrprc*<sup>BKO</sup> mice at RT and 30°C. Body weights of *Lrrprc*<sup>BKO</sup>  
147 and control mice were not different at this age. At basal state, there were no differences  
148 in basal EE, RER, food intake and physical activity (**Fig.1g, Supplementary Fig.3**).  
149 However,  $\beta$ 3 agonist CL 316,423 (CL) stimulation significantly induced heat production in  
150 control mice, and this effect was absent in *Lrrprc*<sup>BKO</sup> mice (**Fig.1h**). Consistently, BAT  
151 <sup>18</sup>F-FDG uptake was also reduced in the *Lrrprc*<sup>BKO</sup> mice (**Supplementary Fig.4a, b**).

152

153 Although both *Tfam*<sup>BKO</sup> and *Lrrprc*<sup>BKO</sup> mice did not have respiration-capable mitochondria  
154 in brown adipocytes and lacked  $\beta$ AR-induced adaptive thermogenesis <sup>15</sup>, they were cold  
155 resistant during CTT paradoxically (**Fig.1i**). This was in sharp contrast to the *Gnas*<sup>BKO</sup>  
156 mice, which also lacked  $\beta$ AR-induced adaptive thermogenesis but were cold sensitive  
157 during CTT <sup>24</sup>. We reason that *Lrrprc*-deficiency, like *Tfam*-deficiency, causes a specific

158 reduction of mtDNA-encoded ETC gene and protein expression (**Fig.1a**)<sup>20</sup>, and  
159 consequently the non-synchronized ETC mRNA and protein expression (NOSEMPE for  
160 short)<sup>12</sup>. NOSEMPE specifically disrupts mitochondrial quality, not quantity. Although  
161 defective mitochondrial quantity and quality in BAT equally abolish  $\beta$ AR-induced adaptive  
162 thermogenesis, NOSEMPE might induce a compensatory thermogenic process that  
163 occurs outside the mitochondria, a hypothetical “nonmitochondrial thermogenesis”. In  
164 comparison, the conventionally viewed cold-induced, Ucp1-mediated heat production  
165 inside mitochondria in brown adipocytes is referred to mitochondrial thermogenesis  
166 hereafter.

167

#### 168 **NOSEMPE activates ATF4-ISR in brown adipocytes**

169 In order to identify the underlying mechanisms for NOSEMPE-induced nonmitochondrial  
170 thermogenesis, we first performed RNA-seq experiments from the BAT of male control  
171 and Lrpprc<sup>BKO</sup> mice housed at RT and 30°C. Clustering analysis of differentially  
172 expressed genes (DEGs) suggested that thermoneutral housing affected BAT  
173 transcriptome more profoundly than Lrpprc deficiency (**Fig.2a**). Volcano plots of DEGs  
174 showed that there were approximately 6 times more up- and down-regulated DEGs in  
175 Lrpprc<sup>BKO</sup> mice at 30°C (**Fig.2b**). Within downregulated DEGs, 132 genes were commonly  
176 observed at both RT and 30°C. The Oxidative phosphorylation pathway was the most  
177 significantly enriched in downregulated DEGs at both ambient temperatures  
178 (**Supplementary Fig.5a, b**). Indeed, the sequencing reads of all 13 mtDNA-encoded ETC



179 subunits were reduced in the BAT of *Lrpprc*<sup>BKO</sup> mice (**Supplementary Fig.5c**), consistent  
180 with our q-PCR analysis (**Fig.1c**).

181

182 On the other hand, pathways of immune cell activation and protein homeostasis were  
183 highly enriched among the upregulated 165 genes at both RT and 30°C (**Supplementary**  
184 **Fig.5d, e**). Cis-regulatory sequence analysis using iRegulon predicted that ATF4 and its  
185 downstream transcription factors ATF3 and DDIT3 were the top regulators of the  
186 upregulated DEGs (**Fig2.c**). For example, 39 (out of 165) genes were predicted to contain  
187 putative ATF4 response element “TTGCATCA” on their promoter regions. These genes  
188 regulated diverse cellular processes, such as response to ER stress, cellular amino acid  
189 metabolism, transport of small molecules, one-carbon metabolism, steroid metabolism  
190 and fibroblast proliferation (**Fig.2d**). We experimentally confirmed that the mRNA levels  
191 of the ATF4 targets were upregulated in the BAT of *Lrpprc*<sup>BKO</sup> mice at both RT and 30°C  
192 fed with either normal chow or HFD (**Supplementary Fig.6a**). Interesting, several ATF4  
193 targets, such as *Cyb5r1*, *Pck2* and *Lonp1*, were also identified amongst the upregulated  
194 proteins in the BAT mitochondria from both *Tfam*<sup>BKO</sup> and *Lrpprc*<sup>BKO</sup> mice (**Supplementary**  
195 **Fig.2i**). Thus, this transcriptomic profiling study indicates that ATF4 transcription network,  
196 also called the integrated stress response (ISR), is activated by NOSEMPE in brown  
197 adipocytes.

198

199 The ISR is centrally controlled by the phosphorylation of eukaryotic translation initiation  
200 factor eIF2 $\alpha$ . When phosphorylated, it specifically induces ATF4 translation and its target  
201 gene expression<sup>27</sup>. Indeed, we observed phosphor-eIF2 $\alpha$  and *Atf4* protein were elevated,

202 along with known ATF4 targets in the BAT of *Lrrprc*<sup>BKO</sup> mice at RT and 30°C (**Fig.2e**).  
203 *Tfam*<sup>BKO</sup> mice, but not betaless mice, showed a similar induction of p-eIF2 $\alpha$  in the BAT  
204 (**Supplementary Fig.6b, c**). Additional clustering analysis using these ATF4 targets in  
205 various mouse models with defective thermogenesis such as betaless, *Gnas*<sup>BKO</sup>,  
206 *Lrrprc*<sup>BKO</sup>, *Tfam*<sup>BKO</sup> mice<sup>15,24</sup> clearly demonstrated that ATF4-dependent ISR was  
207 specifically induced by NOSEMPE, but not a nonspecific adaptive response to defective  
208 thermogenesis in brown adipocytes (**Fig.2f**).

209

### 210 **Nonmitochondrial thermogenesis induced by NOSEMPE and ATF4 is dependent** 211 **on proteome turnover**

212 Since elevated ATF4 expression is sufficient for transcriptional induction of its targets *in*  
213 *vitro* and *in vivo*<sup>28,29</sup>, we then decided to ectopically overexpress ATF4 in brown  
214 adipocytes to examine its consequences on mitochondrial thermogenesis and  
215 nonmitochondrial thermogenesis. We have crossed ROSA-LSL-FlaghATF4 (Flag-tagged  
216 human ATF4 flanked by stop cassette in ROSA locus) with *Ucp1*-Cre mice, to generate  
217 brown adipocyte-specific ATF4 overexpressing mice (*ATF4*<sup>BOX</sup>) and their controls  
218 (**Supplementary Fig.7a**). Flag immunoblot confirmed the presence of Flag-ATF4 protein  
219 in the BAT of the ~8-week-old *ATF4*<sup>BOX</sup> mice at normal chow at RT (**Supplementary**  
220 **Fig.7b**). Similar to *Lrrprc*<sup>BKO</sup> and *Tfam*<sup>BKO</sup> mice, *ATF4*<sup>BOX</sup> mice exhibited marked  
221 upregulation of ATF4 target gene network in the BAT at both RT and 30°C (**Fig.3a**),  
222 further confirming the ISR activation by ATF4 overexpression in the BAT. Thus, the  
223 *ATF4*<sup>BOX</sup> mice phenocopied the *Lrrprc*<sup>BKO</sup> and *Tfam*<sup>BKO</sup> mice in regard to the brown  
224 adipocyte ISR activation specifically.

225

226 Indirect calorimetry experiments showed that the ATF4<sup>BOX</sup> mice exhibited the similar  $\beta$ AR-  
227 induced adaptive thermogenesis as control mice at both ambient temperatures, so did  
228 the basal EE, RER, food intake and physical activity (**Fig.3b, c, Supplementary Fig.7d-**  
229 **f**). This was consistent with the lack of changes in BAT thermogenic and ETC (nuclear-  
230 and mtDNA-encoded) gene expression (**Fig.3a, Supplementary Fig.7c**). Therefore,  
231 ATF4 overexpression in brown adipocytes does not affect mitochondrial ETC gene  
232 expression and  $\beta$ AR-induced adaptive thermogenesis. When housed at RT, ATF4<sup>BOX</sup>  
233 mice were cold resistant as the control mice during CTT, because mitochondrial  
234 thermogenesis was not affected by the ATF4 overexpression in brown adipocytes  
235 (**Fig.3d**). Thermoneutral housing (lack of sympathetic inputs) reduces PGC1 $\alpha$  expression  
236 and mitochondrial biogenesis in brown adipocytes, similar to Gnas deficiency<sup>24</sup>.  
237 Therefore, wild-type mice, acclimated to thermoneutrality, rapidly drop their core  
238 temperature upon CTT due to diminished mitochondrial thermogenesis. However,  
239 ATF4<sup>BOX</sup> mice exhibited enhanced cold resistance during CTT from 30°C (**Fig.3d**), further  
240 suggesting the presence of ATF4-dependent nonmitochondrial thermogenesis in brown  
241 adipocytes.

242

243 Besides Ucp1-mediated uncoupling in mitochondria, heat can be generated through futile  
244 cycles where two metabolic pathways operate simultaneously in opposite directions<sup>30,31</sup>,  
245 such as calcium cycle, creatine cycle, triglyceride-fatty acid cycle, and glycolysis-  
246 gluconeogenesis cycle<sup>32-35</sup>. Proteome turnover, the coupled protein synthesis and  
247 degradation could be a potential thermogenic mechanism especially in brown adipocytes,

248 by wasting ATP to generate heat as the byproduct<sup>36</sup>. As numerous ATF4 signature  
249 genes, involved multiple steps in amino acid synthesis (*Prcy1*, *Phgdh*, *Psat1* and *Mthdf2*),  
250 amino acid transporters (*Slc7a1*, *Slc7a5*, *Slc38a2*), and protein synthesis (aminoacyl-  
251 tRNA synthetases: *Wars*, *Eprs*, *Aars*) were upregulated by NOSEMPE and ATF4  
252 overexpression in brown adipocytes (**Fig.2d**), we reason that ATF4 may promote  
253 proteome turnover primarily due to its anabolic action on protein synthesis.

254  
255 We evaluated rates of protein synthesis in the BAT of ATF4<sup>BOX</sup> mice at both RT and 30°C.  
256 First, ribosome protein S6 and mRNA translation repressor 4Ebp1 were highly  
257 phosphorylated in the BAT of ATF4<sup>BOX</sup> mice (**Fig.3e**), reflecting a higher activity of  
258 mTORC1 (the master regulator of protein synthesis)<sup>37</sup>. We then evaluated the global  
259 protein synthesis rate by puromycin labeling<sup>38</sup>. Indeed, puromycylated proteins were  
260 elevated in the BAT of ATF4<sup>BOX</sup> mice (**Fig.3e**). Next, a protein synthesis inhibitor  
261 (rapamycin) was used to determine the contributions of protein synthesis to the increased  
262 cold resistance phenotype of the ATF4<sup>BOX</sup> mice acclimated at 30°C. Pretreatment of  
263 4mg/kg rapamycin fully abolished elevated p-S6, p-4Ebp1, total puromycylated proteins  
264 in the BAT of ATF4<sup>BOX</sup> mice (**Supplementary Fig.8a**). Importantly, ATF4<sup>BOX</sup> mice were  
265 no longer cold resistant after rapamycin treatment, although control mice behaved  
266 similarly during CTT with or without rapamycin (**Fig.3f**). In contrast, global protein  
267 synthesis was not affected in the muscle of the ATF4<sup>BOX</sup> mice, and rapamycin did not  
268 affect the phosphorylation of S6 and 4Ebp1, and the rates of global protein synthesis in  
269 the muscle (**Supplementary Fig.8b**), suggesting the effect of rapamycin in cold

270 resistance phenotype in the ATF4<sup>BOX</sup> mice was due to inhibition of mTORC1-dependent  
271 protein synthesis specifically in the BAT.

272

273 In parallel, the global ubiquitinated proteins were also elevated (**Fig.3e**) and proteasome  
274 inhibitor (bortezomib) had a similar effect in ATF4<sup>BOX</sup> mice during CTT (**Fig.3f**). Inhibition  
275 of protein synthesis by rapamycin also reduced total ubiquitinated proteins in the BAT of  
276 ATF4<sup>BOX</sup> mice (**Supplementary Fig.8a**), suggesting that protein synthesis and  
277 degradation were coupled and the accelerated proteome turnover in brown adipocytes  
278 contributed to the cold resistance phenotype in the ATF4<sup>BOX</sup> mice.

279

280 We next assessed BAT proteome turnover in Lrpprc<sup>BKO</sup> mice similarly. Phosphorylated  
281 S6 and 4Ebp1 and puromycylated and ubiquitinated proteins were elevated in the BAT of  
282 Lrpprc<sup>BKO</sup> mice (**Supplementary Fig.9a**). Treatment with rapamycin or bortezomib  
283 suppressed the cold resistance phenotype of the Lrpprc<sup>BKO</sup> mice without any noticeable  
284 changes in control mice in CTT (**Fig.3f**). Tfam<sup>BKO</sup> mice, another mouse model of BAT  
285 NOSEMPE, showed similar phenotypes (**Fig.3f, Supplementary Fig.9b**). Collectively,  
286 ATF4-mediated proteome turnover constitutes a mechanism of nonmitochondrial  
287 thermogenesis in brown adipocytes.

288

### 289 **NOSEMPE and ATF4 activation in brown adipocytes promote systemic metabolism**

290 Next, we characterized the metabolic consequences of elevated nonmitochondrial  
291 thermogenesis by either BAT NOSEMPE or ATF4 overexpression. We found that male  
292 Lrpprc<sup>BKO</sup> mice gained less body weight under normal chow feeding at both ambient

293 temperatures (**Supplementary Fig.10a**). At ~8-month of age,  $Lrrprc^{BKO}$  mice exhibited  
294 reduced adipose mass in BAT, subcutaneous inguinal WAT (iWAT) and visceral  
295 epididymal WAT (eWAT) (**Supplementary Fig.10b, c**).

296

297 Male  $Lrrprc^{BKO}$  mice gained less body weight under high fat diet (HFD) (**Fig.4a**). The  
298 difference in body weight was already evident after 4 weeks on HFD and became greater  
299 after longer-period HFD (**Fig.4a, c**). After 12-week HFD, body weight gains of  $Lrrprc^{BKO}$   
300 mice were only 28% and 37% of those of control littermates. The body weight difference  
301 was mainly contributed by reduction of fat mass. Fat percentage was increased in control  
302 mice by four-fold by 12-week HFD, but it barely increased in  $Lrrprc^{BKO}$  mice (**Fig.4d**). Fat  
303 depots like iWAT and eWAT showed progressively reduced weight under HFD and  
304 contained smaller adipocytes, and BAT only showed reduced weight after 12-week HFD  
305 (**Fig.4b, c**). The adipocyte size in eWAT was also reduced in  $Lrrprc^{BKO}$  mice after HFD  
306 (**Fig.4e, f**).

307

308 We also measured other HFD-induced metabolic parameters in male  $Lrrprc^{BKO}$  mice.  
309 Systemic insulin sensitivity was improved in  $Lrrprc^{BKO}$  mice (**Fig.4g-i**) as early as after 4-  
310 week HFD, and serum insulin levels were significantly reduced at 12-week HFD (**Fig.4j**).  
311 HFD-induced hypertriglyceridemia was completely inhibited in  $Lrrprc^{BKO}$  mice. Serum  
312 triglyceride contents were elevated by about four-fold (over 200 mg/dL) in control mice at  
313 RT but remained at lower levels (<40 mg/dL) in  $Lrrprc^{BKO}$  mice after 12-week HFD  
314 (**Fig.4k**). Similar results were also obtained at 30°C (**Fig.4l**). HFD also induced ectopic  
315 triglyceride accumulation in the liver in control mice, which was also absent in  $Lrrprc^{BKO}$

316 mice (**Fig.4m-o**). HFD-induced adipose inflammation was suppressed by *Lrpprc*  
317 deficiency in brown adipocytes. Q-PCR analysis showed macrophage markers (*Cd68*,  
318 *F4/80* and *Cd11c*) and pro-inflammatory cytokines (*Ccl2* and *Leptin*) were reduced in the  
319 eWAT of *Lrpprc*<sup>BKO</sup> mice after 12-week HFD (**Fig.4q-r**) and serum leptin levels were also  
320 reduced (**Fig.4p**). Thus, *Lrpprc* deficiency in brown adipocytes in BAT leads to the  
321 protection against HFD-induced obesity, insulin resistance, hepatic steatosis,  
322 hypertriglyceridemia, and adipose inflammation, despite defective thermogenesis in BAT.  
323 The reduced adiposity and liver TG phenotypes were also observed in female *Lrpprc*<sup>BKO</sup>  
324 mice (**Supplementary Fig.11a-d**). Thus, BAT NOSEMPE improves systemic metabolism  
325 in the *Lrpprc*<sup>BKO</sup> and *Tfam*<sup>BKO</sup> mice despite a complete absence of  $\beta$ AR-induced adaptive  
326 thermogenesis.

327

328 In order to determine whether ATF4 activation in wild-type brown adipocytes is sufficient  
329 to drive systemic metabolic benefits, we performed HFD experiments similarly on  
330 *ATF4*<sup>BOX</sup> mice at both RT and 30°C. Indeed, ATF4-ISR remained elevated in the BAT of  
331 *ATF4*<sup>BOX</sup> mice even after HFD (**Fig.5b**). *ATF4*<sup>BOX</sup> mice gained less body weight, which  
332 was contributed by reduced adiposity (**Fig.5a, c, d**). Again, other metabolic parameters  
333 such as increased adipocyte size and inflammation in white adipose tissue (**Fig.5e, f, m**),  
334 systemic insulin resistance (**Fig.5g-i**), hepatosteatosis and hyperlipidemia (**Fig.5j-l**) were  
335 all suppressed by ATF4 overexpression in brown adipocytes. Taken together, ATF4  
336 activation in brown adipocytes is sufficient to induce nonmitochondrial thermogenesis  
337 from BAT (without an increase of  $\beta$ AR-induced adaptive thermogenesis) and improves  
338 systemic metabolism.

339

340 **ATF4 activation is required for NOSEMPE-induced nonmitochondrial**  
341 **thermogenesis and metabolic benefits**

342 While Atf4 global knockout mice are lean <sup>39,40</sup>, Atf4's specific role in brown adipocytes is  
343 unknown. To address this question, we have generated brown adipocyte-specific Atf4  
344 knockout mice (*Ucp1-Cre;Atf4<sup>ff</sup>*, Atf4<sup>BKO</sup>). Atf4 deficiency in brown adipocytes reduced  
345 ATF4 target gene expression but did not affect multilocular morphology at RT and  
346 mitochondrial ETC gene expression at RT and 30°C (**Supplementary Fig12.a, b**).  
347 Indirect calorimetry experiments showed that Atf4 deficiency did not affect basal and CL-  
348 induced EE, RER, food intake and physical activity (**Supplementary Fig12.c-g**). Most  
349 importantly, HFD-induced obesity, insulin resistance, hepatosteatosis and hyperlipidemia  
350 were not altered by Atf4 deficiency (**Supplementary Fig12.h-o**).

351

352 We then determined whether Atf4 activation in brown adipocytes was required for the  
353 nonmitochondrial thermogenesis and metabolic improvements in *Lrrprc<sup>BKO</sup>* mice. We  
354 have generated brown adipocyte-specific *Lrrprc* and Atf4 double knockout mice (*Ucp1-  
355 Cre;Lrrprc<sup>ff</sup>;Atf4<sup>ff</sup>*, *Lrrprc;Atf4<sup>BKO</sup>*). *Lrrprc* and Atf4 double deficient brown adipocytes  
356 were unilocular and exhibited reduced mtDNA ETC gene expression and p-eIF2 $\alpha$ , similar  
357 to the *Lrrprc<sup>BKO</sup>* mice (**Supplementary Fig.13a, b, Fig.6a**). Consistently, the  
358 *Lrrprc;Atf4<sup>BKO</sup>* mice at 30°C also lacked CL-induced EE due to the defect of mtDNA gene  
359 expression in brown adipocytes (**Fig.6b,c**), but without noticeable changes in basal EE,  
360 food intake and physical activity (**Supplementary Fig.14a-c**). However, the upregulation  
361 of ATF4 target genes and rates of global protein synthesis and degradation induced by



362 Lrprrc deficiency was attenuated by additional Atf4 deficiency in brown adipocytes  
363 (**Supplementary Fig.13b, Fig.6a**). The Lrprrc;Atf4<sup>BKO</sup> mice were no longer cold resistant  
364 in CTT, although Atf4 deficiency itself in brown adipocytes did not affect core body  
365 temperature during CTT (**Supplementary Fig.13c**). We then characterized the full  
366 spectrum of metabolic performance of Lrprrc;Atf4<sup>BKO</sup> mice at 30°C. Compared to the  
367 Lrprrc<sup>BKO</sup> mice, the Lrprrc;Atf4<sup>BKO</sup> mice were no longer protected against HFD-induced  
368 obesity, adipocyte hypertrophy, systemic insulin resistance, hepatosteatosis and  
369 hyperlipidemia (**Fig.6d-h, Supplementary Fig.15a-f**). Thus, Atf4 activation is required for  
370 the NOSEMPE-induced, proteome turnover-fueled nonmitochondrial thermogenesis in  
371 brown adipocytes, and Atf4 deletion fully reverses metabolic benefits without affecting  
372 mitochondrial respiration and mitochondrial thermogenesis in the Lrprrc<sup>BKO</sup> mice.

373

## 374 **DISCUSSION**

375 Comparative studies have suggested that the appearance of thermogenic BAT in  
376 endotherms provides an advantage to survive in cold environment throughout evolution  
377 <sup>41</sup>. Mitochondrial respiration has been long regarded as the essential component of BAT  
378 adaptive thermogenesis. Thus, active brown adipocytes in rodents and humans are  
379 defined by three criteria: multilocular in morphology, rich in mitochondria and positive for  
380 UCP1. Divergent from this “mitochondrial thermogenesis” centric view, our studies  
381 demonstrate that the unilocular and mitochondrial respiration-defective brown adipocytes  
382 in Lrprrc<sup>BKO</sup> and Tfam<sup>BKO</sup> mice (especially at thermoneutrality) can also efficiently  
383 promote systemic metabolic health. Since adult humans mostly live at the thermoneutral  
384 condition, it is feasible that these adipocytes will have the potential to regulate systemic

385 metabolism through the mechanism observed in mice with BAT NOSEMPE or ATF4  
386 activation.

387

388 Moreover, a new concept termed as “nonmitochondrial thermogenesis” is emerging.  
389 Distinct from the well-studied mitochondrial thermogenesis (the  $\beta$ AR-dependent heat  
390 production inside mitochondria), this nonmitochondrial thermogenesis can operate  
391 without  $\beta$ AR stimulation. When housed at RT with mild cold stress, wild-type mice process  
392 activated mitochondrial thermogenesis and minimal nonmitochondrial thermogenesis.  
393  $Gnas^{BKO}$  (or betaless or Ucp1 KO) mice or wild-type mice at thermoneutrality lose  
394 mitochondrial thermogenesis (without changes in nonmitochondrial thermogenesis),  
395 consequently showing defective thermoregulation in CTT. Even though  $Tfam^{BKO}$  and  
396  $Lrrprc^{BKO}$  mice also lack mitochondrial thermogenesis completely at RT, they can still  
397 maintain their core temperature during CTT through augmented ATF4-dependent  
398 nonmitochondrial thermogenesis. Furthermore,  $ATF4^{BOX}$  mice after thermoneutral  
399 housing even exhibited enhanced cold resistance in CTT. Collectively, mitochondrial  
400 thermogenesis and nonmitochondrial thermogenesis are both crucial for organismal  
401 thermoregulation, and nonmitochondrial thermogenesis can even compensate for the  
402 deficiency of mitochondrial thermogenesis *in vivo*.

403

404 However, there are still several unanswered questions regarding this nonmitochondrial  
405 thermogenesis. Cellular proteome balance is precisely controlled by the capacity, velocity  
406 and fidelity of protein synthesis and degradation in the cytosol <sup>42</sup>, and its maintenance is  
407 the most energy-consuming process (utilizing about one-third of total energy) <sup>43-45</sup>.

408 Although we have demonstrated the “NOSEMPE→ATF4→proteome turnover” pathway  
409 as a candidate mechanism for nonmitochondrial thermogenesis in brown adipocytes, its  
410 molecular details are not fully unveiled yet. For example, whether the turnover rates of  
411 specific classes of proteins or global proteome are accelerated in response to NOSEMPE  
412 and/or ATF4 activation is undetermined yet <sup>46,47</sup>. The protein synthesis-promoting effect  
413 of ATF4 has been observed in other cell types *in vitro* <sup>48-51</sup> and *in vivo* <sup>52</sup>. How this  
414 increased protein synthesis is coupled with increased degradation in brown adipocytes  
415 remains unknown, although the ribosome-associated protein quality control <sup>53-55</sup> may  
416 represent one possible mechanism.

417

418 The relative contributions of mitochondrial thermogenesis and nonmitochondrial  
419 thermogenesis in brown adipocytes to systemic metabolism vary. For example, brown  
420 adipocyte-specific *Irf4* overexpression mice (*Irf4*<sup>BOX</sup>) did show enhanced mitochondrial  
421 thermogenesis in brown adipocytes and a slight reduction in HFD-induced obesity, due  
422 to increased mitochondrial biogenesis <sup>10</sup>. While *Gnas*<sup>BKO</sup> and brown adipocyte-specific  
423 *Hdac3* knockout mice (*Hdac3*<sup>BKO</sup>) lacked the mitochondrial thermogenesis but gained  
424 similar body weight under HFD <sup>24,56</sup>. We have demonstrated that mice with elevated  
425 nonmitochondrial thermogenesis in brown adipocytes (*Lrp1rc*<sup>BKO</sup>, *Tfam*<sup>BKO</sup>, and *ATF4*<sup>BOX</sup>  
426 mice), regardless of their activity in mitochondrial thermogenesis, exhibited most profound  
427 anti-obesity phenotype in reported mouse models using *Ucp1* promoter-driven  
428 constitutively active or inducible Cre <sup>10,57,58</sup>. And removing the ATF4-dependent  
429 nonmitochondrial thermogenesis (without affecting mitochondrial thermogenesis) in  
430 *Lrp1rc*<sup>BKO</sup> mice reversed their metabolic benefits completely, suggesting a correlation

431 between the nonmitochondrial thermogenesis in brown adipocytes and systemic  
432 metabolism. Energy wasting itself or byproducts of proteome turnover during this  
433 nonmitochondrial thermogenesis in brown adipocytes may potentially contribute to the  
434 metabolic benefits in *Lrrprc*<sup>BKO</sup>, *Tfam*<sup>BKO</sup>, and *ATF4*<sup>BOX</sup> mice.

435

436 Future investigations into mechanisms and impacts of this novel nonmitochondrial  
437 thermogenesis will establish new paradigms for brown adipocyte biology beyond  
438 mitochondrial thermogenesis<sup>59</sup>. Physiological and/or pathological conditions that affect  
439 any step of mtDNA-encoded protein expression, such as mitochondrial DNA  
440 maintenance, replication, RNA processing/maturation, ribosome assembly or protein  
441 translation<sup>60</sup>, can potentially regulate systemic metabolism by inducing NOSEMPE in  
442 brown adipocytes. Mouse models with BAT NOSEMPE described here can be exploited  
443 to develop new nuclear imaging techniques to visualize the nonmitochondrial  
444 thermogenesis in brown adipocytes, which may be potentially employed in clinical  
445 practice in humans. Finally, targeting ATF4-dependent proteome turnover in brown  
446 adipocytes, besides increasing  $\beta$ AR-induced adaptive thermogenesis to increase total  
447 energy expenditure, may represent novel therapeutic approaches to treat obesity and  
448 associated metabolic disorders.

449

## 450 **Methods**

451 **Mouse models:** ROSA-LSL-FlaghATF4 mice (#029394)<sup>29</sup> were obtained from JAX.  
452 *Lrrprc*<sup>ff</sup>, *Atf4*<sup>ff</sup>, *Ucp1*-Cre (JAX #024670), and betaless mice were kindly provided by Drs.  
453 Nils-Göran Larsson, Christopher Adams, Evan Rosen, and Shingo Kajimura. *Tfam*<sup>BKO</sup>

454 and Gnas<sup>BKO</sup> mice were characterized before <sup>15,24</sup>. Mice were housed in a temperature-  
455 controlled environment at 22°C under a 12h light:dark cycle with free access to water and  
456 food (PicoLab® Rodent Diet 20, #5053). For thermoneutral experiments, ~4-week-old  
457 mice were placed in a 30°C rodent chamber (Power Scientific RIS52SD Rodent  
458 Incubator) for an additional 3-4 weeks to reach their thermoneutral zone. There were no  
459 inclusion/exclusion criteria for mice studies. Mice were in C57BL/6J background (except  
460 for Gnas<sup>BKO</sup> mice). All animal experiments were approved by the UCSF Institutional  
461 Animal Care and Use Committee in adherence to US National Institutes of Health  
462 guidelines and policies.

463 **Metabolic studies:** About 8-week-old mice were transferred to a 60% fat diet (Research  
464 Diets, D12492) housed at RT or 30°C. Body weight was monitored once a week.  
465 EchoMRI was performed following manufacturer's instructions. For insulin tolerance test  
466 (ITT), mice were fasted 4-6 hours before intraperitoneal administration of insulin  
467 (Humulin; 0.75U kg<sup>-1</sup>). Blood glucose was measured from tail vein at indicated time points  
468 with a glucometer (Contour, Bayer). Serum and liver TG contents were measured by  
469 Infinity Triglycerides Reagents (Thermo Scientific, #TR22421). Serum insulin and leptin  
470 levels were measured by commercial ELISA kits (Alpco, #80-INSMSV-E01; Crystal Chem  
471 Inc, #90030).

472 **Indirect calorimetry measurements:** Basal energy expenditure (EE) and CL-induced  
473 EE were calculated per mouse <sup>61,62</sup>. Investigators were blinded to the mouse genotypes  
474 for CLAMS, which was performed by the UCSF Diabetes and Endocrinology Research  
475 Center Metabolic Research Unit.

476 **<sup>18</sup>F-fluorodeoxyglucose (FDG) uptake:** A dedicated small animal PET/CT (Inveon,  
477 Siemens Medical Solutions, Malvern, PA) was used for all imaging procedures at room  
478 temperature. For consistent data acquisition, all animals were fasted overnight, at least  
479 12 hours, before administration of <sup>18</sup>F-fluorodeoxyglucose (FDG). FDG (3.94±0.17 MBq,  
480 range: 3.67-4.17 MBq) was administered intravenously via tail vein under anesthesia (2-  
481 2.5% isoflurane). Uptake time of 55 min (±1 min) was strictly followed before the start of  
482 the scan. During the uptake time, the animals were awake and kept warm over a  
483 temperature-controlled heating pad at 37 °C. Ten-minute static PET data were acquired  
484 for all animals, followed by CT under isoflurane (2-2.5%) anesthesia. The total imaging  
485 time was under 20 minutes. Once the data for PET and CT were acquired, reconstructions  
486 were performed using vendor-provided software. An iterative reconstruction algorithm  
487 with CT-based attenuation correction was used for PET, and a Feldkamp reconstruction  
488 algorithm modified for conebeam was used for CT. The reconstructed volumes were  
489 128×128×159 matrices with a voxel size of 0.776383 mm × 0.776383 mm × 0.796 mm  
490 for PET, and 512×512×700 matrices with an isotropic voxel size of 0.196797 mm ×  
491 0.196797 mm × 0.196797 mm for CT. The CT acquisition parameters were: continuous  
492 120 rotation steps over 220°, 80 kVp/500 μA tube voltage/current, and 175 ms exposure  
493 per step. Spherical VOIs (2 mm diameter) were drawn completely within brown adipose  
494 tissue, back of the cervical spine of each animal, and % injected dose per unit volume  
495 (%ID/ml) was calculated for analysis.

496 **Cold tolerance test (CTT):** ~8-week old male and female mouse was singly housed with  
497 free-access to food and water during CTT. The core body temperatures prior to and during  
498 4°C cold exposure (at one-hour interval) were measured using BAT-12 Microprobe

499 Thermometer with probe RET-3 (Physitemp). 4mg kg<sup>-1</sup> rapamycin (TCI America,  
500 #TCR0097) or 0.625 mg kg<sup>-1</sup> bortezomib (Selleck, #S1013) or DMSO (Sigma, #D8418)  
501 was injected intraperitoneally 1 hour prior to CTT.

502 **ETC Complex Activities:** Frozen BAT tissue from about 8-week-old male and female  
503 mice was homogenized in 250  $\mu$ L homogenization buffer (120 mM KCl, 20mM HEPES,  
504 1mM EGTA, pH 7.4) by sonication (5 second pulse x 5, 60% power) using a Microson  
505 XL2000 Ultrasonic Cell Disruptor (Misonix). Protein was quantitated using the Bradford  
506 assay and all samples were diluted to a final concentration of 1 $\mu$ g/ $\mu$ l of protein. The  
507 spectrophotometric kinetic assays were performed using a monochromator microplate  
508 reader (Tecan M200 Pro). Complex I activity (NADH:ubiquinone oxidoreductase) was  
509 determined by measuring oxidation of NADH at 340 nm (using ferricyanide as the electron  
510 acceptor) in a reaction mixture of 50 mM potassium phosphate (pH 7.5), 0.2 mM NADH,  
511 and 1.7 mM potassium ferricyanide. Complex II activity (Succinate Dehydrogenase) was  
512 determined by measuring the reduction of the artificial electron acceptor 2,6-  
513 dichlorophenol-indophenol (DCIP) at 600 nm in a reaction mixture of 50 mM potassium  
514 phosphate (pH 7.5), 20 mM succinate, 2  $\mu$ M DCIP, 10  $\mu$ M rotenone, and 1 mM potassium  
515 cyanide. Complex III activity (Ubiquinol:cytochrome *c* oxidoreductase) was determined  
516 by measuring the reduction of cytochrome *c* at 550 nm in a reaction mixture of 50 mM  
517 potassium phosphate (pH 7.5), 35  $\mu$ M reduced decylubiquinone, 15  $\mu$ M cytochrome *c*, 10  
518  $\mu$ M rotenone, and 1 mM potassium cyanide. Complex IV activity (Cytochrome *c* oxidase)  
519 was determined by measuring the oxidation of cytochrome *c* at 550 nm in a reaction  
520 mixture of 50 mM potassium phosphate (pH 7.0) and 100  $\mu$ M reduced cytochrome *c*.  
521 Citrate synthase activity was determined by measuring the reduction of 5,5'-dithiobis (2-

522 nitrobenzoic acid) (DTNB) at 412 nm which was coupled to the reduction of acetyl-CoA  
523 by citrate synthase in the presence of oxaloacetate. The reaction mixture consisted of  
524 100 mM Tris-HCl (pH 8.0), 100  $\mu$ M DTNB, 50  $\mu$ M acetyl-CoA, and 425  $\mu$ M oxaloacetate.  
525 All activities were calculated as nmoles/min/mg protein, normalized to citrate synthase  
526 (CS) activity and finally expressed as the percentage of wild-type activity.

527 **Mitochondria Isolation:** Freshly dissected BAT tissue from about 8-week-old male and  
528 female mice was homogenized in a Dounce homogenizer with 5ml ice-cold mitochondria  
529 isolation buffer (210mM Mannitol, 70mM Sucrose, 1mM EGTA, 5mM HEPES pH7.5,  
530 0.5% BSA). The homogenates were filtered through cheesecloth to remove residual  
531 particulates and intact mitochondria were isolated by differential centrifugation using a  
532 previously described protocol <sup>63</sup>. The mitochondrial pellet was resuspended in 25 $\mu$ L of  
533 isolation buffer and protein was quantitated using the Bradford assay (BioRad, #500-  
534 0006).

535 **Mass spectrometry:** Purified BAT mitochondria from 10-12-week old male mice housed  
536 at RT or 30°C (n=3 for each genotype/condition) were resuspended in 8 M urea, 50 mM  
537 Tris, 5 mM CaCl<sub>2</sub>, 100 mM NaCl, and protease inhibitors. Mitochondria were lysed by  
538 probe sonication on ice, and proteins reduced by the addition of 5 mM DTT for 30 min at  
539 37°C, followed cysteine alkylation by the addition of 15 mM iodoacetamide at RT for 45  
540 min in the dark. The reaction was then quenched by the addition of 15 mM DTT for 15  
541 minutes at RT. Proteins were first digested by the addition of endoproteinase LysC (Wako  
542 LC) at a 1:50 substrate:enzyme and incubated for 2h at RT. Next, samples were further  
543 digested by the addition of trypsin (Promega) at 1:100 substrate:enzyme, and incubated  
544 overnight at 37°C. Protein digests were then acidified by the addition of 0.5%



545 trifluoroacetic acid, and samples desalted on C18 stage tips (Rainin). Peptides were  
546 resuspended in 4% formic acid and 3% acetonitrile, and approximately 1µg of digested  
547 mitochondria proteins was loaded onto a 75µm ID column packed with 25cm of Reprosil  
548 C18 1.9µm, 120Å particles. Peptides were eluted into an Orbitrap Fusion Tribrid (Thermo  
549 Fisher) mass spectrometer by gradient elution delivered by an Easy1200 nLC system  
550 (Thermo Fisher). The gradient was from 4.5% to 31% acetonitrile over 120 minutes. MS1  
551 spectra were collected with oribitrap detection, while the 15 most abundant ions were  
552 fragmented by HCD and detected in the ion trap. All data were searched against the *Mus*  
553 *musculus* uniprot database (downloaded July 22, 2016). Peptide and protein identification  
554 searches were performed using the MaxQuant data analysis algorithm, and all peptide  
555 and protein identifications were filtered to a 1% false-discovery rate <sup>64,65</sup>. Label free  
556 quantification analysis was pefromed using the MSstats R-package <sup>66</sup>. Proteome  
557 changes of each ETC complex were calculated by averaging log2 values of fold change  
558 of all identified proteins within individual ETC complex.

559 **Histology:** Tissues were fixed in 10% formalin and processed and stained at AML  
560 Laboratories. Cell size was measured using ImageJ. Adipocyte size distribution was  
561 calculated using total adipocyte numbers counted in multiple images.

562 **Immunoblots:** Puromycin (ThermoFisher, #A1113803) was injected intraperitoneally at  
563 the dose of 0.04 µmol g<sup>-1</sup> 30 minutes prior to tissue collection. For lysates, tissues were  
564 lysed in ice-cold lysis-buffer (50 mM Tris-HCl, 150 mM NaCl, 1 mM EDTA, 6 mM EGTA,  
565 20 mM NaF, 1% Triton X-100, 1µM MG132 and protease inhibitors) using a TissueLyser  
566 II (Qiagen). After centrifugation at 13000 rpm for 15 min, supernatants were reserved for  
567 protein determinations and SDS-PAGE analysis. Mitochondria were lyzed in the above

568 lysis buffer before immunoblotting. Antibodies used were: Ucp1 (Sigma, #U6382), FLAG  
569 (Sigma, #F1804), Lrp1rc (Santa Cruz Biotechnology, #SC-66844), Atf4 (Cell Signaling  
570 Technology, #11815), p-eIF2 $\alpha$  (Cell Signaling Technology, #3398), eIF2 $\alpha$  (Cell Signaling  
571 Technology, #5324), p-S6 (Cell Signaling Technology, #5364), S6 (Cell Signaling  
572 Technology, #2217X), p-4Ebp1 (Cell Signaling Technology, # 2855), 4Ebp1 (Cell  
573 Signaling Technology, #9452), Hsp90 (Santa Cruz Biotechnology, #SC-7949), total  
574 OXPHOS protein (Abcam, #ab110413), mt-Co2 (Proteintech, #55070-1-A), Cox4 (Cell  
575 Signaling Technology, #4850), Cox5b (Bethyl, #A-305-523A), Cox6b (Abgent,  
576 #AP20624a), Hsp60 (Bethyl, #A302-846A), puromycin (Kerafast, #EQ0001), and  
577 Ubiquitin (Santa Cruz Biotechnology, #SC-8017).

578 **Q-PCR and RNA-seq:** Total RNA was extracted from tissues homogenized in TRIsure  
579 (Bioline, #BIO-38033) reagent and ISOLATE II RNA Mini kit (Bioline, #BIO-52073).  
580 Isolated RNA was reverse transcribed using iScript cDNA Synthesis Kit (Biorad, #170-  
581 8891), and the resulting cDNA was used for quantitative PCR on a CFX384 real-time  
582 PCR detection system (Bio-Rad). Relative mRNA expression level was determined using  
583 the 2<sup>(-Delta Ct)</sup> method with 36B4 as the internal reference control. Primer sequences  
584 are listed in Supplementary Table 2. RNA-seq was performed by Novogene Inc. Briefly,  
585 first strand cDNA was synthesized using random hexamer primer and M-MuLV Reverse  
586 Transcriptase (RNase H). Second strand cDNA synthesis was subsequently performed  
587 using DNA Polymerase I and RNase H. Double-stranded cDNA was purified using  
588 AMPure XP beads. Remaining overhangs of the purified double-stranded cDNA were  
589 converted into blunt ends via exonuclease/polymerase activities. After adenylation of 3'  
590 ends of DNA fragments, NEBNext Adaptor with hairpin loop structure was ligated to

591 prepare for hybridization. In order to select cDNA fragments of preferentially 150~200bp  
592 in length, the library fragments were purified with AMPure XP system (Beckman Coulter,  
593 Beverly, USA). The libraries were sequenced in Illumina for 20 million reads with pair-end  
594 150 bp (PE150). Downstream analysis was performed using a combination of programs  
595 including STAR, HTseq and Cufflink. Alignments were parsed using Tophat program and  
596 differentially expressed genes (DEGs) were determined through DESeq2/edgeR. KEGG  
597 enrichment was implemented by ClusterProfiler. Cis-regulatory sequence analysis was  
598 performed using iRegulon plugin in Cytoscape.

599 **mtDNA Quantification:** The relative mtDNA content was measured using qPCR. The  $\beta 2$   
600 microglobulin gene (B2M) was used as the nuclear gene (nDNA) normalizer for  
601 calculation of the mtDNA/nDNA ratio. A 322bp region of the mouse mtDNA was amplified  
602 using forward primer mtDNAF (CGACCTCGATGTTGGATCA) and the reverse primer  
603 mtDNAR (AGAGGATTTGAACCTCTGG). A fragment of the B2M gene was amplified  
604 using forward primer, B2MF (TCTCTGCTCCCCACCTCTAAGT), and reverse primer,  
605 B2MR (TGCTGTCTCGATGTTTGATGTATCT), giving an amplicon of 106 bp. The  
606 relative mtDNA content was calculated using the formula:  $\text{mtDNA content} = 1/2^{\Delta C_t}$ , where  
607  $\Delta C_t = C_t^{\text{mtDNA}} - C_t^{\text{B2M}}$ .

## 608 **Quantification and statistical analysis**

609 Data was presented as average  $\pm$  SEM. Statistical significance was determined by t-test  
610 using GraphPad Prism 7. \*:  $p < 0.05$  and \*\*:  $p < 0.01$ . Sample sizes for animal experiments  
611 were selected based on numbers typically used in similar published studies. No  
612 randomization of animals or predetermination of sample sizes by statistical methods was

613 performed. No samples were measured repeatedly. *In vivo* metabolic experiments were  
614 repeated 2-3 times.

615

#### 616 **Data accessibility**

617 The mass spectrometry data files (raw and search results) have been deposited to the  
618 ProteomeXchange Consortium (<http://proteomecentral.proteomexchange.org>) via the  
619 PRIDE partner repository with dataset identifier PXD008798. The raw RNA-seq data has  
620 been deposited to NCBI GEO (accession number GSE117985).

621

#### 622 **Acknowledgements**

623 This work is supported by National Institutes of Health (NIH) grants DK105175 (B.W.),  
624 U54NS100717 (N.J.K.), P50GM082250 (N.J.K.), UCSF Diabetes Research Center  
625 P30DK063720 (B.W.), UCSF Nutrition Obesity Research Center P30DK098722 (B.W.),  
626 S10RR023051 (S.Y.). E.P. is supported by a fellowship grant from Hillblom foundation.  
627 We would like to thank Christophe Paillart and Vassily Kutuyavin for assistance with  
628 indirect calorimetry experiments.

629

#### 630 **Author contributions**

631 B.W. and E.P. planned the experiments and wrote the manuscript. E.P. performed and  
632 analyzed thermogenic and metabolic phenotypes in animal studies. Y.Z. assisted in  
633 mouse colony maintenance, immunoblots and various assays. R.M. participated the initial  
634 studies. D.L.S., D.J-M., M.S., and N.J.K. performed mass spectrometry experiment and  
635 analyzed the data. T.L.H., and Y.S. performed <sup>18</sup>F-FDG experiment.

636

637 **Competing interests**

638 Authors declare no competing financial interests.

639

640 **Materials & Correspondence**

641 Correspondence and requests for materials should be addressed to Biao Wang

642 (Biao.Wang@ucsf.edu).

643 **References:**

- 644 1 Cannon, B. & Nedergaard, J. Brown adipose tissue: function and physiological  
645 significance. *Physiological reviews* **84**, 277-359,  
646 doi:10.1152/physrev.00015.2003 (2004). 14715917.
- 647 2 Cannon, B. & Nedergaard, J. Nonshivering thermogenesis and its adequate  
648 measurement in metabolic studies. *The Journal of experimental biology* **214**,  
649 242-253, doi:10.1242/jeb.050989 (2011). 21177944.
- 650 3 Cypess, A. M. *et al.* Identification and importance of brown adipose tissue in  
651 adult humans. *The New England journal of medicine* **360**, 1509-1517,  
652 doi:10.1056/NEJMoa0810780 (2009). 19357406. PMID Pmc2859951
- 653 4 Virtanen, K. A. *et al.* Functional brown adipose tissue in healthy adults. *The New*  
654 *England journal of medicine* **360**, 1518-1525, doi:10.1056/NEJMoa0808949  
655 (2009). 19357407.
- 656 5 van Marken Lichtenbelt, W. D. *et al.* Cold-activated brown adipose tissue in  
657 healthy men. *The New England journal of medicine* **360**, 1500-1508,  
658 doi:10.1056/NEJMoa0808718 (2009). 19357405.
- 659 6 Betz, M. J. & Enerback, S. Human Brown Adipose Tissue: What We Have  
660 Learned So Far. *Diabetes* **64**, 2352-2360, doi:10.2337/db15-0146 (2015).  
661 26050667.
- 662 7 Bartelt, A. & Heeren, J. Adipose tissue browning and metabolic health. *Nature*  
663 *reviews. Endocrinology* **10**, 24-36, doi:10.1038/nrendo.2013.204 (2014).  
664 24146030.
- 665 8 Betz, M. J. & Enerback, S. Targeting thermogenesis in brown fat and muscle to  
666 treat obesity and metabolic disease. *Nature reviews. Endocrinology* **14**, 77-87,  
667 doi:10.1038/nrendo.2017.132 (2018). 29052591.
- 668 9 Lowell, B. B. & Spiegelman, B. M. Towards a molecular understanding of  
669 adaptive thermogenesis. *Nature* **404**, 652-660, doi:10.1038/35007527 (2000).  
670 10766252.
- 671 10 Kong, X. *et al.* IRF4 is a key thermogenic transcriptional partner of PGC-1alpha.  
672 *Cell* **158**, 69-83, doi:10.1016/j.cell.2014.04.049 (2014). 24995979. PMID  
673 PMC4116691
- 674 11 Spiegelman, B. M. Transcriptional control of mitochondrial energy metabolism  
675 through the PGC1 coactivators. *Novartis Foundation symposium* **287**, 60-63;  
676 discussion 63-69 (2007). 18074631.
- 677 12 Couvillion, M. T., Soto, I. C., Shipkovenska, G. & Churchman, L. S. Synchronized  
678 mitochondrial and cytosolic translation programs. *Nature* **533**, 499-503,  
679 doi:10.1038/nature18015 (2016). 27225121. PMID PMC4964289
- 680 13 Richter-Dennerlein, R. *et al.* Mitochondrial Protein Synthesis Adapts to Influx of  
681 Nuclear-Encoded Protein. *Cell* **167**, 471-483.e410,  
682 doi:10.1016/j.cell.2016.09.003 (2016). 27693358. PMID PMC5055049
- 683 14 Latorre-Pellicer, A. *et al.* Mitochondrial and nuclear DNA matching shapes  
684 metabolism and healthy ageing. *Nature* **535**, 561-565, doi:10.1038/nature18618  
685 (2016). 27383793.

- 686 15 Masand, R. *et al.* Proteome Imbalance of Mitochondrial Electron Transport Chain  
687 in Brown Adipocytes Leads to Metabolic Benefits. *Cell metabolism* **27**, 616-  
688 629.e614, doi:10.1016/j.cmet.2018.01.018 (2018). 29514069.
- 689 16 Ruzzenente, B. *et al.* LRPPRC is necessary for polyadenylation and coordination  
690 of translation of mitochondrial mRNAs. *The EMBO journal* **31**, 443-456,  
691 doi:10.1038/emboj.2011.392 (2012). 22045337. PMCID PMC3261557
- 692 17 Siira, S. J. *et al.* LRPPRC-mediated folding of the mitochondrial transcriptome.  
693 *Nature communications* **8**, 1532, doi:10.1038/s41467-017-01221-z (2017).  
694 29146908. PMCID PMC5691074
- 695 18 Spahr, H. *et al.* SLIRP stabilizes LRPPRC via an RRM-PPR protein interface.  
696 *Nucleic acids research* **44**, 6868-6882, doi:10.1093/nar/gkw575 (2016).  
697 27353330. PMCID PMC5001613
- 698 19 Debray, F. G. *et al.* LRPPRC mutations cause a phenotypically distinct form of  
699 Leigh syndrome with cytochrome c oxidase deficiency. *Journal of medical*  
700 *genetics* **48**, 183-189, doi:10.1136/jmg.2010.081976 (2011). 21266382.
- 701 20 Mootha, V. K. *et al.* Identification of a gene causing human cytochrome c oxidase  
702 deficiency by integrative genomics. *Proceedings of the National Academy of*  
703 *Sciences of the United States of America* **100**, 605-610,  
704 doi:10.1073/pnas.242716699 (2003). 12529507. PMCID PMC141043
- 705 21 Thompson Legault, J. *et al.* A Metabolic Signature of Mitochondrial Dysfunction  
706 Revealed through a Monogenic Form of Leigh Syndrome. *Cell reports* **13**, 981-  
707 989, doi:10.1016/j.celrep.2015.09.054 (2015). 26565911. PMCID PMC4644511
- 708 22 Wang, Y. *et al.* Adipocyte Liver Kinase b1 Suppresses Beige Adipocyte  
709 Renaissance Through Class IIa Histone Deacetylase 4. *Diabetes*,  
710 doi:10.2337/db17-0296 (2017). 28882900.
- 711 23 Lowell, B. B. *et al.* Development of obesity in transgenic mice after genetic  
712 ablation of brown adipose tissue. *Nature* **366**, 740-742, doi:10.1038/366740a0  
713 (1993). 8264795.
- 714 24 Paulo, E. *et al.* Sympathetic inputs regulate adaptive thermogenesis in brown  
715 adipose tissue through cAMP-Salt inducible kinase axis. *Scientific reports* **8**,  
716 11001, doi:10.1038/s41598-018-29333-6 (2018). 30030465. PMCID  
717 PMC6054673
- 718 25 Bachman, E. S. *et al.* betaAR signaling required for diet-induced thermogenesis  
719 and obesity resistance. *Science* **297**, 843-845, doi:10.1126/science.1073160  
720 (2002). 12161655.
- 721 26 Enerback, S. *et al.* Mice lacking mitochondrial uncoupling protein are cold-  
722 sensitive but not obese. *Nature* **387**, 90-94, doi:10.1038/387090a0 (1997).  
723 9139827.
- 724 27 Pakos-Zebrucka, K. *et al.* The integrated stress response. *EMBO reports* **17**,  
725 1374-1395, doi:10.15252/embr.201642195 (2016). 27629041. PMCID  
726 PMC5048378
- 727 28 Shan, J., Ord, D., Ord, T. & Kilberg, M. S. Elevated ATF4 expression, in the  
728 absence of other signals, is sufficient for transcriptional induction via CCAAT  
729 enhancer-binding protein-activating transcription factor response elements. *The*  
730 *Journal of biological chemistry* **284**, 21241-21248, doi:10.1074/jbc.M109.011338  
731 (2009). 19509279. PMCID PMC2755847

- 732 29 Masuda, M. *et al.* Activating transcription factor-4 promotes mineralization in  
733 vascular smooth muscle cells. *JCI insight* **1**, e88646,  
734 doi:10.1172/jci.insight.88646 (2016). 27812542. PMID PMC5085604
- 735 30 Tseng, Y. H., Cypess, A. M. & Kahn, C. R. Cellular bioenergetics as a target for  
736 obesity therapy. *Nature reviews. Drug discovery* **9**, 465-482,  
737 doi:10.1038/nrd3138 (2010). 20514071. PMID Pmc2880836
- 738 31 Qian, H. & Beard, D. A. Metabolic futile cycles and their functions: a systems  
739 analysis of energy and control. *Systems biology* **153**, 192-200 (2006). 16986621.
- 740 32 Kazak, L. *et al.* A creatine-driven substrate cycle enhances energy expenditure  
741 and thermogenesis in beige fat. *Cell* **163**, 643-655,  
742 doi:10.1016/j.cell.2015.09.035 (2015). 26496606. PMID PMC4656041
- 743 33 Ikeda, K. *et al.* UCP1-independent signaling involving SERCA2b-mediated  
744 calcium cycling regulates beige fat thermogenesis and systemic glucose  
745 homeostasis. *Nature medicine* **23**, 1454-1465, doi:10.1038/nm.4429 (2017).  
746 29131158.
- 747 34 Guan, H. P. *et al.* A futile metabolic cycle activated in adipocytes by antidiabetic  
748 agents. *Nature medicine* **8**, 1122-1128, doi:10.1038/nm780 (2002). 12357248.
- 749 35 Shulman, G. I., Ladenson, P. W., Wolfe, M. H., Ridgway, E. C. & Wolfe, R. R.  
750 Substrate cycling between gluconeogenesis and glycolysis in euthyroid,  
751 hypothyroid, and hyperthyroid man. *The Journal of clinical investigation* **76**, 757-  
752 764, doi:10.1172/jci112032 (1985). 4031071. PMID PMC423896
- 753 36 Koeppen, B. M. & Stanton, B. A. *Berne & Levy physiology.* (Elsevier, 2018).
- 754 37 Saxton, R. A. & Sabatini, D. M. mTOR Signaling in Growth, Metabolism, and  
755 Disease. *Cell* **169**, 361-371, doi:10.1016/j.cell.2017.03.035 (2017). 28388417.
- 756 38 Aviner, R., Geiger, T. & Elroy-Stein, O. Genome-wide identification and  
757 quantification of protein synthesis in cultured cells and whole tissues by  
758 puromycin-associated nascent chain proteomics (PUNCH-P). *Nature protocols* **9**,  
759 751-760, doi:10.1038/nprot.2014.051 (2014). 24603934.
- 760 39 Seo, J. *et al.* Atf4 regulates obesity, glucose homeostasis, and energy  
761 expenditure. *Diabetes* **58**, 2565-2573, doi:10.2337/db09-0335 (2009). 19690063.  
762 PMID PMC2768187
- 763 40 Wang, C. *et al.* ATF4 regulates lipid metabolism and thermogenesis. *Cell*  
764 *research* **20**, 174-184, doi:10.1038/cr.2010.4 (2010). 20066008.
- 765 41 Jastroch, M., Oelkrug, R. & Keipert, S. Insights into brown adipose tissue  
766 evolution and function from non-model organisms. *The Journal of experimental*  
767 *biology* **221**, doi:10.1242/jeb.169425 (2018). 29514888.
- 768 42 Harper, J. W. & Bennett, E. J. Proteome complexity and the forces that drive  
769 proteome imbalance. *Nature* **537**, 328-338, doi:10.1038/nature19947 (2016).  
770 27629639. PMID PMC5204264
- 771 43 Buttgerit, F. & Brand, M. D. A hierarchy of ATP-consuming processes in  
772 mammalian cells. *The Biochemical journal* **312** ( Pt 1), 163-167 (1995). 7492307.  
773 PMID PMC1136240
- 774 44 Kepp, K. P. & Dasmeh, P. A model of proteostatic energy cost and its use in  
775 analysis of proteome trends and sequence evolution. *PloS one* **9**, e90504,  
776 doi:10.1371/journal.pone.0090504 (2014). 24587382. PMID PMC3938754



- 777 45 Rolfe, D. F. & Brown, G. C. Cellular energy utilization and molecular origin of  
778 standard metabolic rate in mammals. *Physiological reviews* **77**, 731-758,  
779 doi:10.1152/physrev.1997.77.3.731 (1997). 9234964.
- 780 46 Mathieson, T. *et al.* Systematic analysis of protein turnover in primary cells.  
781 *Nature communications* **9**, 689, doi:10.1038/s41467-018-03106-1 (2018).  
782 29449567. PMID PMC5814408
- 783 47 Boisvert, F. M. *et al.* A quantitative spatial proteomics analysis of proteome  
784 turnover in human cells. *Molecular & cellular proteomics : MCP* **11**,  
785 M111.011429, doi:10.1074/mcp.M111.011429 (2012). 21937730. PMID  
786 PMC3316722
- 787 48 Adams, C. M. Role of the transcription factor ATF4 in the anabolic actions of  
788 insulin and the anti-anabolic actions of glucocorticoids. *The Journal of biological*  
789 *chemistry* **282**, 16744-16753, doi:10.1074/jbc.M610510200 (2007). 17430894.
- 790 49 Quiros, P. M. *et al.* Multi-omics analysis identifies ATF4 as a key regulator of the  
791 mitochondrial stress response in mammals. *The Journal of cell biology* **216**,  
792 2027-2045, doi:10.1083/jcb.201702058 (2017). 28566324. PMID PMC5496626
- 793 50 Park, Y., Reyna-Neyra, A., Philippe, L. & Thoreen, C. C. mTORC1 Balances  
794 Cellular Amino Acid Supply with Demand for Protein Synthesis through Post-  
795 transcriptional Control of ATF4. *Cell reports* **19**, 1083-1090,  
796 doi:10.1016/j.celrep.2017.04.042 (2017). 28494858. PMID PMC5811220
- 797 51 Han, J. *et al.* ER-stress-induced transcriptional regulation increases protein  
798 synthesis leading to cell death. *Nature cell biology* **15**, 481-490,  
799 doi:10.1038/ncb2738 (2013). 23624402. PMID PMC3692270
- 800 52 Kuhl, I. *et al.* Transcriptomic and proteomic landscape of mitochondrial  
801 dysfunction reveals secondary coenzyme Q deficiency in mammals. *eLife* **6**,  
802 doi:10.7554/eLife.30952 (2017). 29132502. PMID PMC5703644
- 803 53 Duttler, S., Pechmann, S. & Frydman, J. Principles of cotranslational  
804 ubiquitination and quality control at the ribosome. *Molecular cell* **50**, 379-393,  
805 doi:10.1016/j.molcel.2013.03.010 (2013). 23583075. PMID PMC3886275
- 806 54 Kim, W. *et al.* Systematic and quantitative assessment of the ubiquitin-modified  
807 proteome. *Molecular cell* **44**, 325-340, doi:10.1016/j.molcel.2011.08.025 (2011).  
808 21906983. PMID PMC3200427
- 809 55 Rodrigo-Brenni, M. C. & Hegde, R. S. Design principles of protein biosynthesis-  
810 coupled quality control. *Developmental cell* **23**, 896-907,  
811 doi:10.1016/j.devcel.2012.10.012 (2012). 23153486.
- 812 56 Emmett, M. J. *et al.* Histone deacetylase 3 prepares brown adipose tissue for  
813 acute thermogenic challenge. *Nature* **546**, 544-548, doi:10.1038/nature22819  
814 (2017). 28614293.
- 815 57 Guerra, C. *et al.* Brown adipose tissue-specific insulin receptor knockout shows  
816 diabetic phenotype without insulin resistance. *The Journal of clinical investigation*  
817 **108**, 1205-1213, doi:10.1172/jci13103 (2001). 11602628. PMID PMC209529
- 818 58 Rosenwald, M., Perdikari, A., Rulicke, T. & Wolfrum, C. Bi-directional  
819 interconversion of brite and white adipocytes. *Nature cell biology* **15**, 659-667,  
820 doi:10.1038/ncb2740 (2013). 23624403.

- 821 59 Chouchani, E. T., Kazak, L. & Spiegelman, B. M. New Advances in Adaptive  
822 Thermogenesis: UCP1 and Beyond. *Cell metabolism*,  
823 doi:10.1016/j.cmet.2018.11.002 (2018). 30503034.
- 824 60 Hallberg, B. M. & Larsson, N. G. Making proteins in the powerhouse. *Cell*  
825 *metabolism* **20**, 226-240, doi:10.1016/j.cmet.2014.07.001 (2014). 25088301.
- 826 61 Butler, A. A. & Kozak, L. P. A recurring problem with the analysis of energy  
827 expenditure in genetic models expressing lean and obese phenotypes. *Diabetes*  
828 **59**, 323-329, doi:10.2337/db09-1471 (2010). 20103710. PMCID PMC2809965
- 829 62 Tschöp, M. H. *et al.* A guide to analysis of mouse energy metabolism. *Nature*  
830 *methods* **9**, 57-63, doi:10.1038/nmeth.1806 (2012). 22205519. PMCID  
831 PMC3654855
- 832 63 Cannon, B. & Lindberg, O. Mitochondria from brown adipose tissue: isolation and  
833 properties. *Methods in enzymology* **55**, 65-78 (1979). 459860.
- 834 64 Cox, J. *et al.* Accurate proteome-wide label-free quantification by delayed  
835 normalization and maximal peptide ratio extraction, termed MaxLFQ. *Molecular &*  
836 *cellular proteomics : MCP* **13**, 2513-2526, doi:10.1074/mcp.M113.031591 (2014).  
837 24942700. PMCID PMC4159666
- 838 65 Cox, J. & Mann, M. MaxQuant enables high peptide identification rates,  
839 individualized p.p.b.-range mass accuracies and proteome-wide protein  
840 quantification. *Nature biotechnology* **26**, 1367-1372, doi:10.1038/nbt.1511  
841 (2008). 19029910.
- 842 66 Choi, M. *et al.* MSstats: an R package for statistical analysis of quantitative mass  
843 spectrometry-based proteomic experiments. *Bioinformatics (Oxford, England)* **30**,  
844 2524-2526, doi:10.1093/bioinformatics/btu305 (2014). 24794931.
- 845

846 **FIGURE LEGENDS**

847 **Figure 1. BAT NOSEMPE induces nonmitochondrial thermogenesis in *Lrpprc*<sup>BKO</sup>**  
848 **mice. (a)** Roles of *Tfam* and *Lrpprc* in mtDNA ETC protein expression. **(b)**  
849 Representative H&E staining of BAT from ~8-12-week of male CON (*Lrpprc*<sup>ff</sup>) and  
850 *Lrpprc*<sup>BKO</sup> (*Ucp1-Cre;Lrpprc*<sup>ff</sup>) mice housed at room temperature (RT) and  
851 thermoneutrality (30°C). Scale bar: 50µm. **(c)** Heatmap showing the log<sub>2</sub> fold changes of  
852 *Lrpprc*, mtDNA-encoded and nuclear-encoded ETC subunits in the BAT from ~8-12-week  
853 of male CON and *Lrpprc*<sup>BKO</sup> mice housed at RT and 30°C. Sample size: CON/RT (n=4),  
854 *Lrpprc*<sup>BKO</sup>/RT (n=4), CON/30°C (n=4) and *Lrpprc*<sup>BKO</sup>/30°C (n=6). **(d)** Immunoblots of  
855 complex IV subunits (mt-Co1, mt-Co2, Cox4, Cox5b, Cox6b) and Hsp60 in isolated  
856 mitochondria from above mice. **(e)** Log<sub>2</sub> fold change values of each proteome from BAT  
857 of *Lrpprc*<sup>BKO</sup> mice. **(f)** Relative *in vitro* enzyme activities of Complex I to IV and citrate  
858 synthase (CS) in BAT of ~8-12-week old male CON and *Lrpprc*<sup>BKO</sup> mice housed at RT  
859 and 30°C. Sample size: CON/RT (n=4), *Lrpprc*<sup>BKO</sup>/RT (n=4), CON/30°C (n=4) and  
860 *Lrpprc*<sup>BKO</sup>/30°C (n=6). Average night and day EE **(g)** and hourly CL-induced EE **(h)** in ~8-  
861 12-week old male CON and *Lrpprc*<sup>BKO</sup> mice housed at RT and 30°C. Sample size:  
862 CON/RT (n=6), *Lrpprc*<sup>BKO</sup>/RT (n=6), CON/30°C (n=6) and *Lrpprc*<sup>BKO</sup>/30°C (n=7). **(i)** Cold  
863 tolerance test (CTT) of ~8-12-week old male and female *Lrpprc*<sup>BKO</sup>, *Tfam*<sup>BKO</sup>, *Gnas*<sup>BKO</sup>  
864 and their relative control mice housed at RT. Note: data from *Gnas*<sup>BKO</sup> and relative control  
865 was from our previous publication <sup>24</sup>. Sample size: *Lrpprc*<sup>ff</sup> (CON) (n=6), *Lrpprc*<sup>BKO</sup> (n=9),  
866 *Tfam*<sup>ff</sup> (CON) (n=4), *Tfam*<sup>BKO</sup> (n=4), *Gnas*<sup>ff</sup> (CON) (n=12), and *Gnas*<sup>BKO</sup> (n=9). Data was  
867 presented as average ± SEM. Student t-test. \*: p<0.05 and \*\*: p<0.01.

868 **Figure 2. NOSEMPE specifically activates ATF4-ISR in brown adipocytes. (a)**  
869 Heatmap showing hcluster analysis of DEGs in the BAT of male CON and *Lrpprc*<sup>BKO</sup> mice  
870 at RT and 30°C. **(b)** Volcano plots showing significantly ( $p < 0.05$ ) down- or up-regulated  
871 genes in the BAT of *Lrpprc*<sup>BKO</sup> mice at RT and 30°C. **(c)** List of enriched Transcript factors  
872 (TF) in commonly up-regulated DEGs in the BAT of CON and *Lrpprc*<sup>BKO</sup> mice at RT and  
873 30°C. Name, motif sequence and number of targets of each TF shown. **(d)** ATF4 signaling  
874 network. GO terms of ATF4 targets shown. **(e)** Immunoblots showing amounts of *Lrpprc*,  
875 p-eIF2 $\alpha$ , total eIF2 $\alpha$ , *Atf4* and Hsp90 in the BAT of ~8-12-week-old male CON and  
876 *Lrpprc*<sup>BKO</sup> mice at normal chow at both RT and 30°C. **(f)** Clustering analysis of log<sub>2</sub> fold  
877 changes of known ATF4 target genes in the BAT of mouse models with defective  
878 thermogenesis (*Lrpprc*<sup>BKO</sup>, *Tfam*<sup>BKO</sup>, *Gnas*<sup>BKO</sup> and *betaless* mice) at normal chow at both  
879 RT and 30°C.

880 **Figure 3. Brown adipocyte-specific ATF4 overexpression is sufficient to induce the**  
881 **nonmitochondrial thermogenesis fueled by proteome turnover. (a)** Heatmap  
882 showing the log<sub>2</sub> fold changes of mtDNA-encoded and nuclear-encoded ETC subunits  
883 and ATF4 targets in the BAT from ~8-12-week of male CON and brown adipocyte-specific  
884 ATF4 overexpression (ATF4<sup>BOX</sup>) mice housed at RT and 30°C. Sample size: CON/RT  
885 (n=8), ATF4<sup>BOX</sup>/RT (n=8), CON/30°C (n=4) and ATF4<sup>BOX</sup>/30°C (n=6). Average night and  
886 day EE **(b)** and hourly CL-induced EE **(c)** in ~8-12-week old male CON and ATF4<sup>BOX</sup>  
887 mice for three days at RT and 30°C. Sample size: CON/RT (n=10), ATF4<sup>BOX</sup>/RT (n=4),  
888 CON/30°C (n=10) and ATF4<sup>BOX</sup>/30°C (n=5). **(d)** CTT of ~8-12-week old male and female  
889 CON and ATF4<sup>BOX</sup> mice housed at RT and 30°C. Sample size: CON/RT (n=5),  
890 ATF4<sup>BOX</sup>/RT (n=5), CON/30°C (n=6) and ATF4<sup>BOX</sup>/30°C (n=7). **(e)** Immunoblots of p-S6,  
891 total S6, p-4Ebp1, total 4Ebp1, puromycylated protein, ubiquitinated protein and Hsp90  
892 in the BAT of ~10-week-old male CON and ATF4<sup>BOX</sup> mice housed at RT and 30°C. **(f)**  
893 Core temperature drop of ~10-week-old male and female CON and ATF4<sup>BOX</sup> mice with  
894 pretreatment of DMSO or 4mg/kg rapamycin, or 0.625mg/kg bortezomib after 3 hours 4°C  
895 CTT from 30°C. Core temperature drop of ~10-week-old male and female Lrrp<sup>BKO</sup> and  
896 Tfam<sup>BKO</sup> mice and their relative controls with pretreatment of DMSO or rapamycin or  
897 bortezomib after 8 hours 4°C CTT from RT. Sample size: For ATF4<sup>BOX</sup>mice:  
898 CON/30°C/DMSO (n=13), ATF4<sup>BOX</sup>/30°C/DMSO (n=11), CON/30°C/rapamycin (n=5),  
899 ATF4<sup>BOX</sup>/30°C/rapamycin (n=8), CON/30°C/bortezomib (n=5) and ATF4<sup>BOX</sup>/30°C/  
900 bortezomib (n=7). For Lrrp<sup>BKO</sup> mice: CON/RT/DMSO (n=4), Lrrp<sup>BKO</sup>/RT/DMSO (n=4),  
901 CON/RT/rapamycin (n=6), Lrrp<sup>BKO</sup>/RT/rapamycin (n=7), CON/RT/bortezomib (n=4)  
902 and Lrrp<sup>BKO</sup>/RT/bortezomib (n=4). For Tfam<sup>BKO</sup> mice: CON/RT/DMSO (n=4),

903 Tfam<sup>BKO</sup>/RT/DMSO (n=4), CON/RT/rapamycin (n=4), Tfam<sup>BKO</sup>/RT/rapamycin (n=5),  
904 CON/RT/bortezomib (n=3) and Tfam<sup>BKO</sup>/RT/bortezomib (n=6). Data was presented as  
905 average ± SEM. Student t-test. n.s.: non-significant; \*\*: p<0.01.

906 **Figure 4. Lrpprc<sup>BKO</sup> mice exhibit improved systemic metabolism under HFD. (a)**  
907 Body weight of male CON and Lrpprc<sup>BKO</sup> mice under 12-week HFD at RT and 30°C.  
908 Sample size: CON/RT (n=12), Lrpprc<sup>BKO</sup>/RT (n=11), CON/30°C (n=7) and Lrpprc<sup>BKO</sup>/30°C  
909 (n=15). **(b)** Representative images of dissected iWAT, eWAT and BAT from male CON  
910 and Lrpprc<sup>BKO</sup> mice after 12-week HFD. **(c)** Tissue mass of eWAT, iWAT, and BAT of  
911 male CON and Lrpprc<sup>BKO</sup> mice at normal chow (NC) and after HFD. Sample size: male  
912 CON/NC/RT (n=8), Lrpprc<sup>BKO</sup>/NC/RT (n=10), CON/4w-HFD/RT (n=8), Lrpprc<sup>BKO</sup>/4w-  
913 HFD/RT (n=6), CON/12w-HFD/RT (n=5), Lrpprc<sup>BKO</sup>/12w-HFD/RT (n=5), CON/8w-  
914 HFD/30°C (n=4), Lrpprc<sup>BKO</sup>/8w-HFD/30°C (n=6), CON/12w-HFD/30°C (n=6) and  
915 Lrpprc<sup>BKO</sup>/12w-HFD/30°C (n=13). **(d)** Fat percentage, lean and fat mass of male CON  
916 and Lrpprc<sup>BKO</sup> mice before and after 4-week and 12-week HFD at RT and 30°C. Sample  
917 size: CON/NC/RT (n=3), Lrpprc<sup>BKO</sup>/NC/RT (n=7), CON/4w-HFD/RT (n=10),  
918 Lrpprc<sup>BKO</sup>/4w-HFD/RT (n=9), CON/12w-HFD/RT (n=56), Lrpprc<sup>BKO</sup>/12w-HFD/RT (n=5),  
919 CON/NC/30°C (n=7), Lrpprc<sup>BKO</sup>/NC/30°C (n=6), CON/4w-HFD/30°C (n=6), Lrpprc<sup>BKO</sup>/4w-  
920 HFD/30°C (n=8), CON/12w-HFD/30°C (n=6) and Lrpprc<sup>BKO</sup>/12w-HFD/30°C (n=13). **(e)**  
921 Representative H&E staining of eWAT from male CON and Lrpprc<sup>BKO</sup> mice after 12-week  
922 HFD. Scale bar: 100 μm. **(f)** Adipocyte size distribution in eWAT from male CON and  
923 Lrpprc<sup>BKO</sup> mice after 12-week HFD. Total adipocytes counted: CON/RT (n=200),  
924 Lrpprc<sup>BKO</sup>/RT (n=519), CON/30°C (n=347) and Lrpprc<sup>BKO</sup>/30°C (n=666). Serum glucose  
925 levels during ITT in male CON and Lrpprc<sup>BKO</sup> mice after 4-week and 12-week HFD at RT  
926 **(g)** and 30°C **(h)**. Sample size: CON/4w-HFD/RT (n=8), Lrpprc<sup>BKO</sup>/4w-HFD/RT (n=7),  
927 CON/12w-HFD/RT (n=5), Lrpprc<sup>BKO</sup>/12w-HFD/RT (n=5), CON/4w-HFD/30°C (n=6),  
928 Lrpprc<sup>BKO</sup>/4w-HFD/30°C (n=9), CON/12w-HFD/30°C (n=7) and Lrpprc<sup>BKO</sup>/12w-HFD/30°C

929 (n=15). **(i)** Area under the curve (AUC) values of glucose levels in ITTs showed. **(j)** Serum  
930 insulin levels in male CON and Lrprrc<sup>BKO</sup> mice after 12-week HFD. Sample size: CON/RT  
931 (n=5), Lrprrc<sup>BKO</sup>/RT (n=4), CON/30°C (n=4), Lrprrc<sup>BKO</sup>/30°C (n=6). **(k)** Serum triglyceride  
932 contents of male CON and Lrprrc<sup>BKO</sup> mice after HFD at RT. Sample size: Sample size:  
933 CON/NC/RT (n=6), Lrprrc<sup>BKO</sup>/NC/RT (n=10), CON/4w-HFD/RT (n=8), Lrprrc<sup>BKO</sup>/4w-  
934 HFD/RT (n=10), CON/12w-HFD/RT (n=5) and Lrprrc<sup>BKO</sup>/12w-HFD/RT (n=5). **(l)** Serum  
935 triglyceride contents of male CON and Lrprrc<sup>BKO</sup> mice after 12-week HFD at 30°C.  
936 Sample size: CON/12w-HFD/30°C (n=6) and Lrprrc<sup>BKO</sup>/12w-HFD/30°C (n=13). **(m)**  
937 Representative H&E staining of liver from male CON and Lrprrc<sup>BKO</sup> mice after 12-week  
938 HFD. Scale bar: 100 μm. **(n)** Liver triglyceride contents of male CON and Lrprrc<sup>BKO</sup> mice  
939 after HFD at RT. Sample size: CON/NC/RT (n=6), Lrprrc<sup>BKO</sup>/NC/RT (n=7), CON/4w-  
940 HFD/RT (n=7), Lrprrc<sup>BKO</sup>/4w-HFD/RT (n=6), CON/12w-HFD/RT (n=5) and  
941 Lrprrc<sup>BKO</sup>/12w-HFD/RT (n=5). **(o)** Liver triglyceride contents of male CON and Lrprrc<sup>BKO</sup>  
942 mice after 12-week HFD at 30°C. Sample size: CON/12w-HFD/30°C (n=7) and  
943 Lrprrc<sup>BKO</sup>/12w-HFD/30°C (n=14). **(p)** Serum leptin levels in male CON and Lrprrc<sup>BKO</sup>  
944 mice after 12-week. Sample size: CON/RT (n=5), Lrprrc<sup>BKO</sup>/RT (n=5), CON/30°C (n=4)  
945 and Lrprrc<sup>BKO</sup>/30°C (n=8). Q-PCR analysis of mRNA levels of macrophage markers  
946 (*Cd68*, *F4/80* and *Cd11c*) and pro-inflammatory cytokines (*Ccl2* and *Leptin*) in eWAT of  
947 male CON and Lrprrc<sup>BKO</sup> mice after 12-week HFD at RT **(q)** and 30°C **(r)**. Sample size:  
948 CON/RT (n=7), Lrprrc<sup>BKO</sup>/RT (n=7), CON/30°C (n=8) and Lrprrc<sup>BKO</sup>/30°C (n=8). Data  
949 was presented as average ± SEM. Student t-test. \*: p<0.05 and \*\*: p<0.01.

950



951 **Figure 5. ATF4 activation in brown adipocytes is sufficient to drive metabolic**  
952 **fitness. (a)** Body weight of male CON and ATF4<sup>BOX</sup> mice after 12-week HFD at RT and  
953 30°C. Sample size: CON/RT (n=8), ATF4<sup>BOX</sup>/RT (n=8), CON/30°C (n=17) and  
954 ATF4<sup>BOX</sup>/30°C (n=18). **(b)** Heatmap showing log<sub>2</sub> fold changes of known ATF4 target  
955 genes in the BAT of ATF4<sup>BOX</sup> mice after 4-week HFD at both RT and 30°C. Sample size:  
956 CON/RT (n=8), ATF4<sup>BOX</sup>/RT (n=7), CON/30°C (n=4) and ATF4<sup>BOX</sup>/30°C (n=6). **(c)** Tissue  
957 mass of eWAT, iWAT, and BAT of male CON and ATF4<sup>BOX</sup> mice after 12-week HFD.  
958 Sample size: male CON/RT (n=8), ATF4<sup>BOX</sup>/RT (n=8), CON/30°C (n=13) and  
959 ATF4<sup>BOX</sup>/30°C (n=13). **(d)** Lean mass, fat mass, and fat percentage of male CON and  
960 Lrp1<sup>CR</sup> mice after 12-week HFD. Sample size: CON/RT (n=8), ATF4<sup>BOX</sup>/RT (n=8),  
961 CON/30°C (n=13) and ATF4<sup>BOX</sup>/30°C (n=13). **(e)** Representative H&E staining of eWAT  
962 from male CON and ATF4<sup>BOX</sup> mice after 12-week HFD. Scale bar: 100 μm. **(f)** Adipocyte  
963 size distribution in eWAT from male CON and ATF4<sup>BOX</sup> mice after 12-week HFD. Total  
964 adipocytes counted: CON/RT (n=2647), ATF4<sup>BOX</sup>/RT (n=2312), CON/30°C (n=1868) and  
965 ATF4<sup>BOX</sup>/30°C (n=2650). **(g)** Serum glucose levels during ITT in male CON and ATF4<sup>BOX</sup>  
966 mice after 12-week HFD at RT and 30°C. **(h)** Area under the curve (AUC) values of  
967 glucose levels in ITTs showed. Sample size: CON/RT (n=8), ATF4<sup>BOX</sup>/RT (n=8),  
968 CON/30°C (n=9) and ATF4<sup>BOX</sup>/30°C (n=10). **(i)** Serum insulin levels in male CON and  
969 ATF4<sup>BOX</sup> mice after 12-week HFD. Sample size: CON/RT (n=6), ATF4<sup>BOX</sup>/RT (n=6),  
970 CON/30°C (n=7), ATF4<sup>BOX</sup>/30°C (n=5). **(j)** Serum triglyceride contents of male CON and  
971 ATF4<sup>BOX</sup> mice after 12-week HFD. Sample size: CON/RT (n=8), ATF4<sup>BOX</sup>/RT (n=8),  
972 CON/30°C (n=8) and ATF4<sup>BOX</sup>/30°C (n=10). **(k)** Representative H&E staining of liver from  
973 male CON and ATF4<sup>BOX</sup> mice after 12-week HFD. Scale bar: 100 μm. **(l)** Liver triglyceride

974 contents of male CON and ATF4<sup>BOX</sup> mice after 12-week HFD. Sample size: CON/RT  
975 (n=8), ATF4<sup>BOX</sup>/RT (n=8), CON/30°C (n=8) and ATF4<sup>BOX</sup>/30°C (n=10). **(m)** Q-PCR  
976 analysis of mRNA levels of macrophage markers (*Cd68*, *F4/80* and *Cd11c*) and pro-  
977 inflammatory cytokines (*Ccl2* and *Leptin*) in eWAT of male CON and ATF4<sup>BOX</sup> mice after  
978 12-week HFD. Sample size: CON/RT (n=8), ATF4<sup>BOX</sup>/RT (n=8), CON/30°C (n=7) and  
979 ATF4<sup>BOX</sup>/30°C (n=5). Data was presented as average ± SEM. Student t-test. \*: p<0.05  
980 and \*\*: p<0.01.  
981

982 **Figure 6. Atf4 activation is required for augmented nonmitochondrial**  
983 **thermogenesis and metabolic fitness in Lrprrc<sup>BKO</sup> mice at 30°C. (a)** Immunoblots of  
984 Lrprrc, p-eIF2 $\alpha$ , total eIF2 $\alpha$ , p-S6, total S6, p-4Ebp1, total 4Ebp1, puromycylated protein,  
985 ubiquitinated protein and Hsp90 in the BAT of ~10-week-old male CON, Lrprrc<sup>BKO</sup> and  
986 Lrprrc;Atf4<sup>BKO</sup> mice housed at 30°C. Average night and day EE **(b)** and hourly CL-  
987 induced EE **(c)** in ~10-week old male CON, Lrprrc<sup>BKO</sup> and Lrprrc;Atf4<sup>BKO</sup> mice for three  
988 days. Sample size: CON (n=6), Lrprrc<sup>BKO</sup> (n=3), and Lrprrc;Atf4<sup>BKO</sup> (n=3). **(d)** Body  
989 weight of male CON, Lrprrc<sup>BKO</sup> and Lrprrc;Atf4<sup>BKO</sup> mice under 12-week HFD at 30°C. **(e)**  
990 Tissue mass of eWAT, iWAT, and BAT of male CON, Lrprrc<sup>BKO</sup> and Lrprrc;Atf4<sup>BKO</sup> mice  
991 after 12-week HFD. Sample size: CON (n=11), Lrprrc<sup>BKO</sup> (n=7), and Lrprrc;Atf4<sup>BKO</sup> (n=6).  
992 Serum insulin **(f)**, serum triglyceride contents and **(g)** and liver triglyceride contents **(h)** of  
993 male CON, Lrprrc<sup>BKO</sup> and Lrprrc;Atf4<sup>BKO</sup> mice after HFD. Sample size: CON (n=9),  
994 Lrprrc<sup>BKO</sup> (n=6), and Lrprrc;Atf4<sup>BKO</sup> (n=5). Data was presented as average  $\pm$  SEM.  
995 Student t-test. \*: p<0.05 and \*\*: p<0.01.

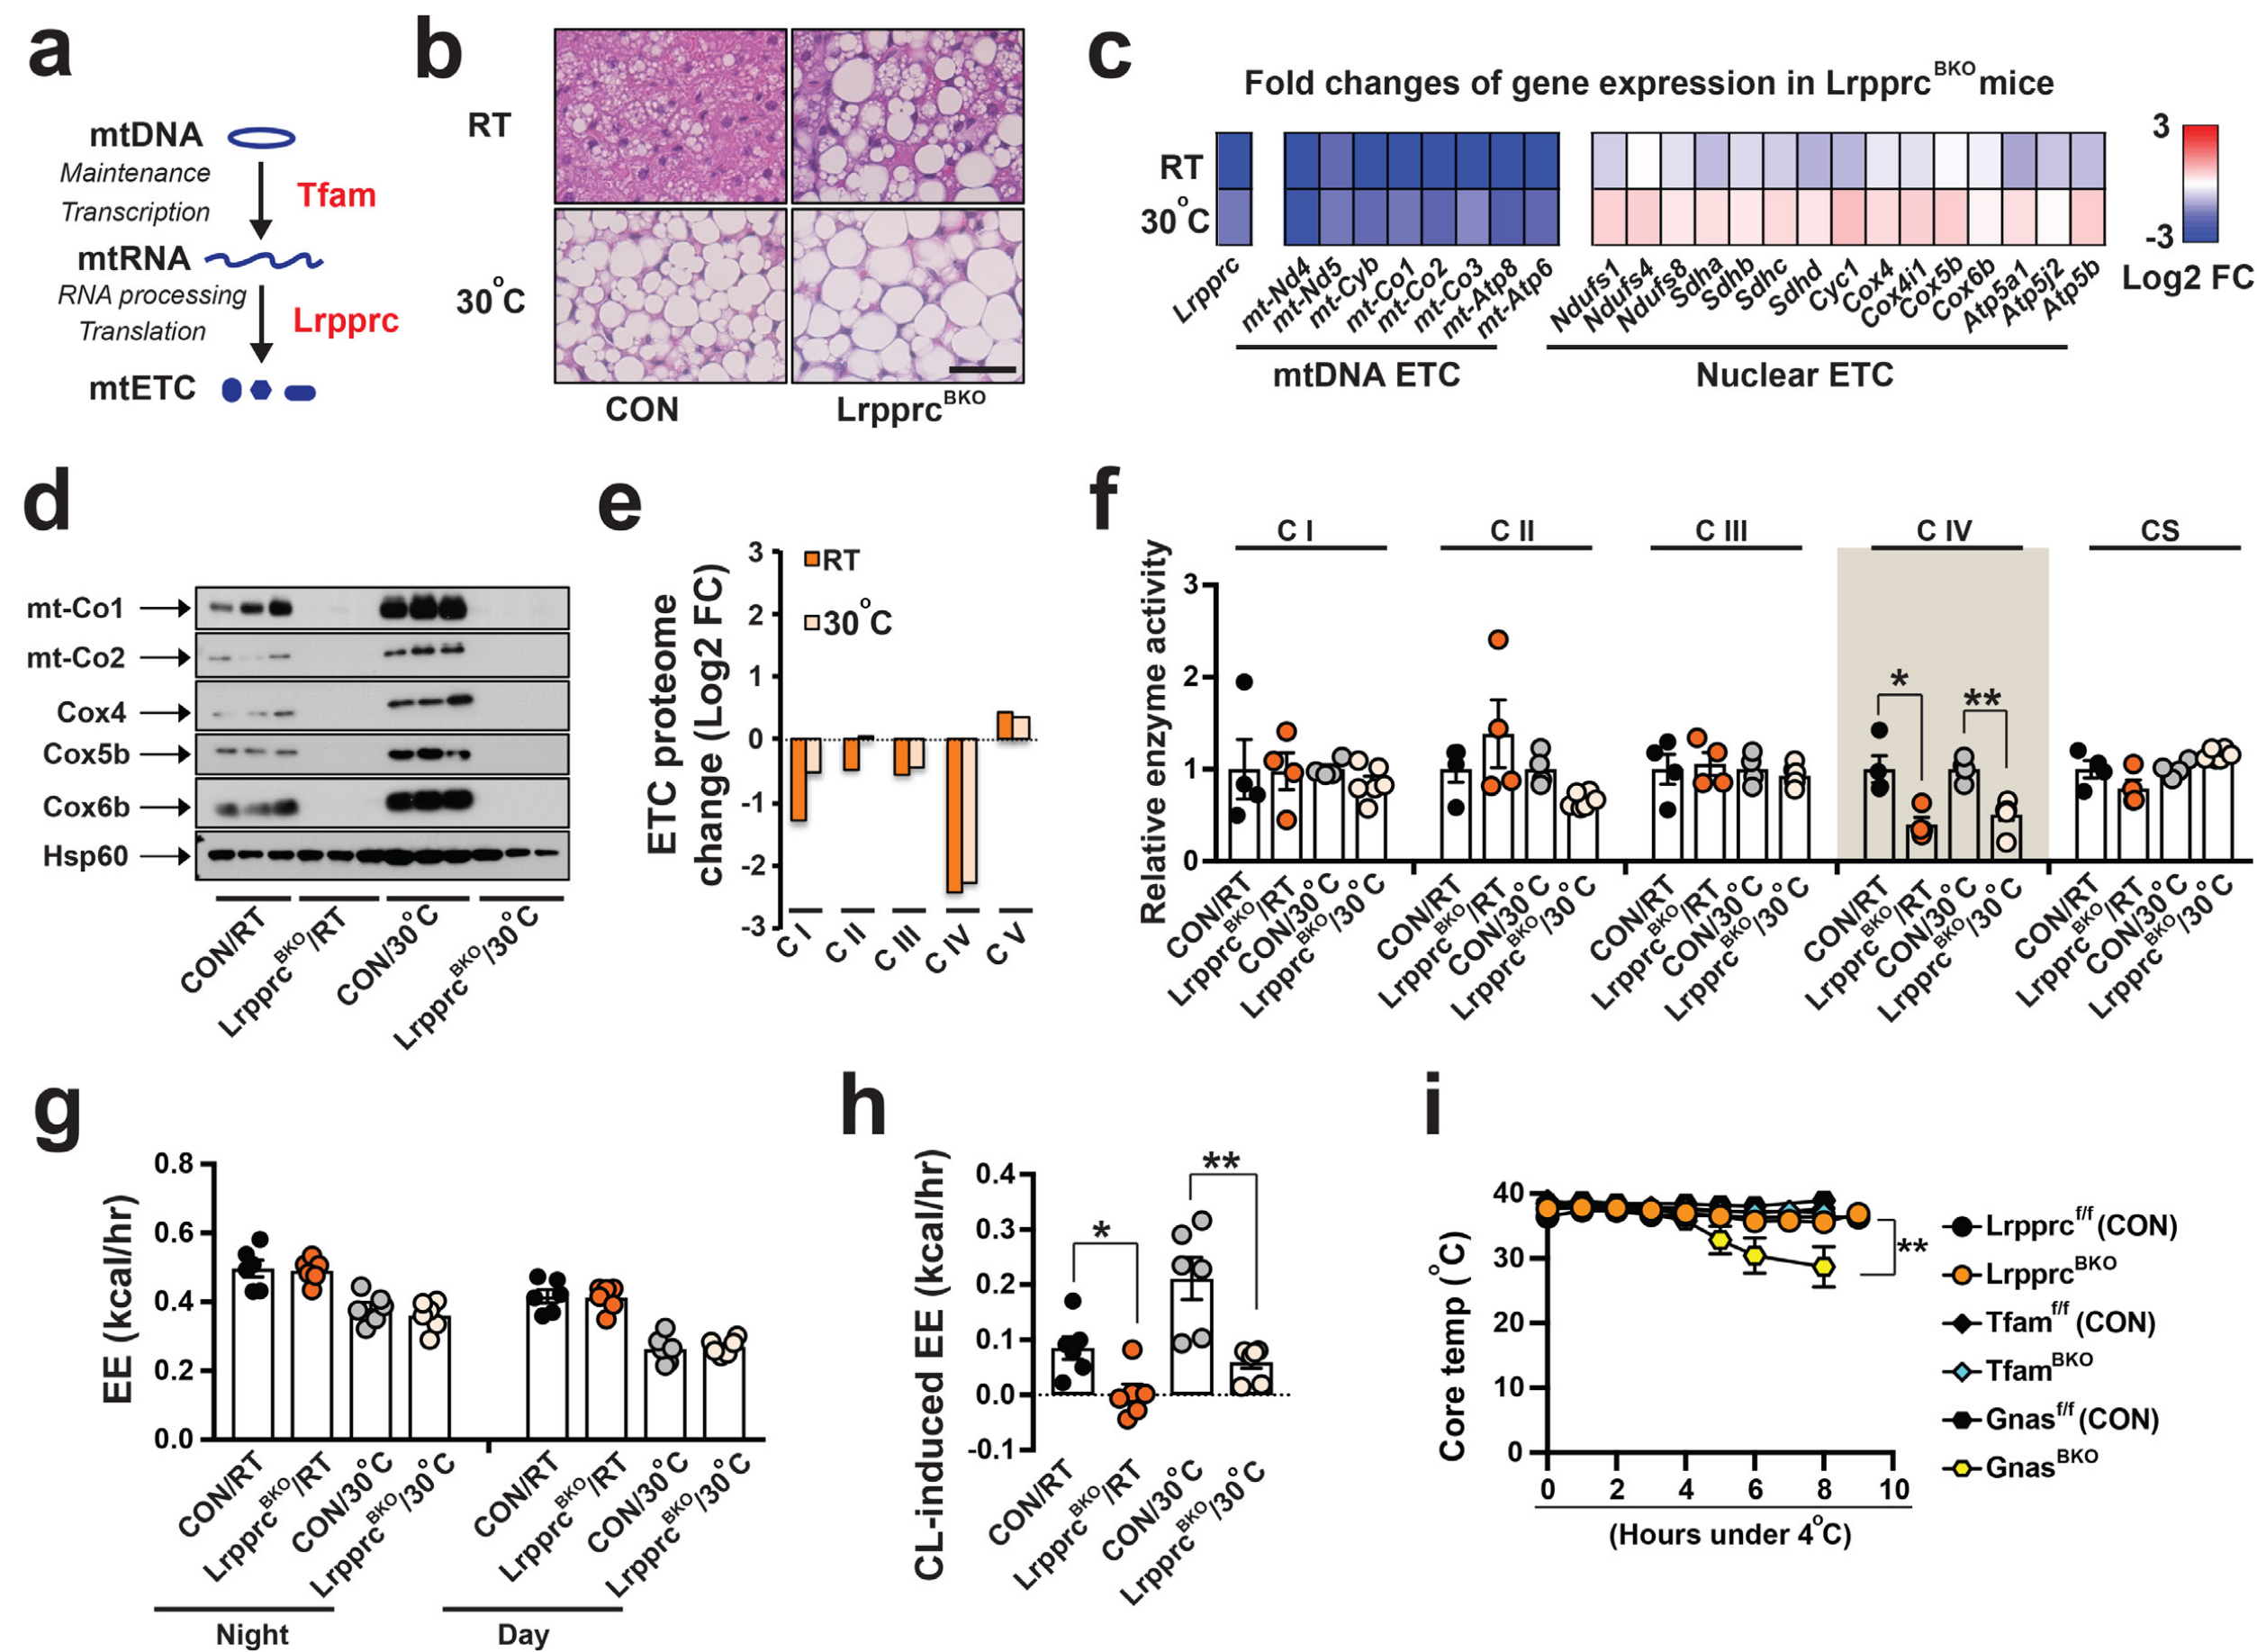

**Figure 1**

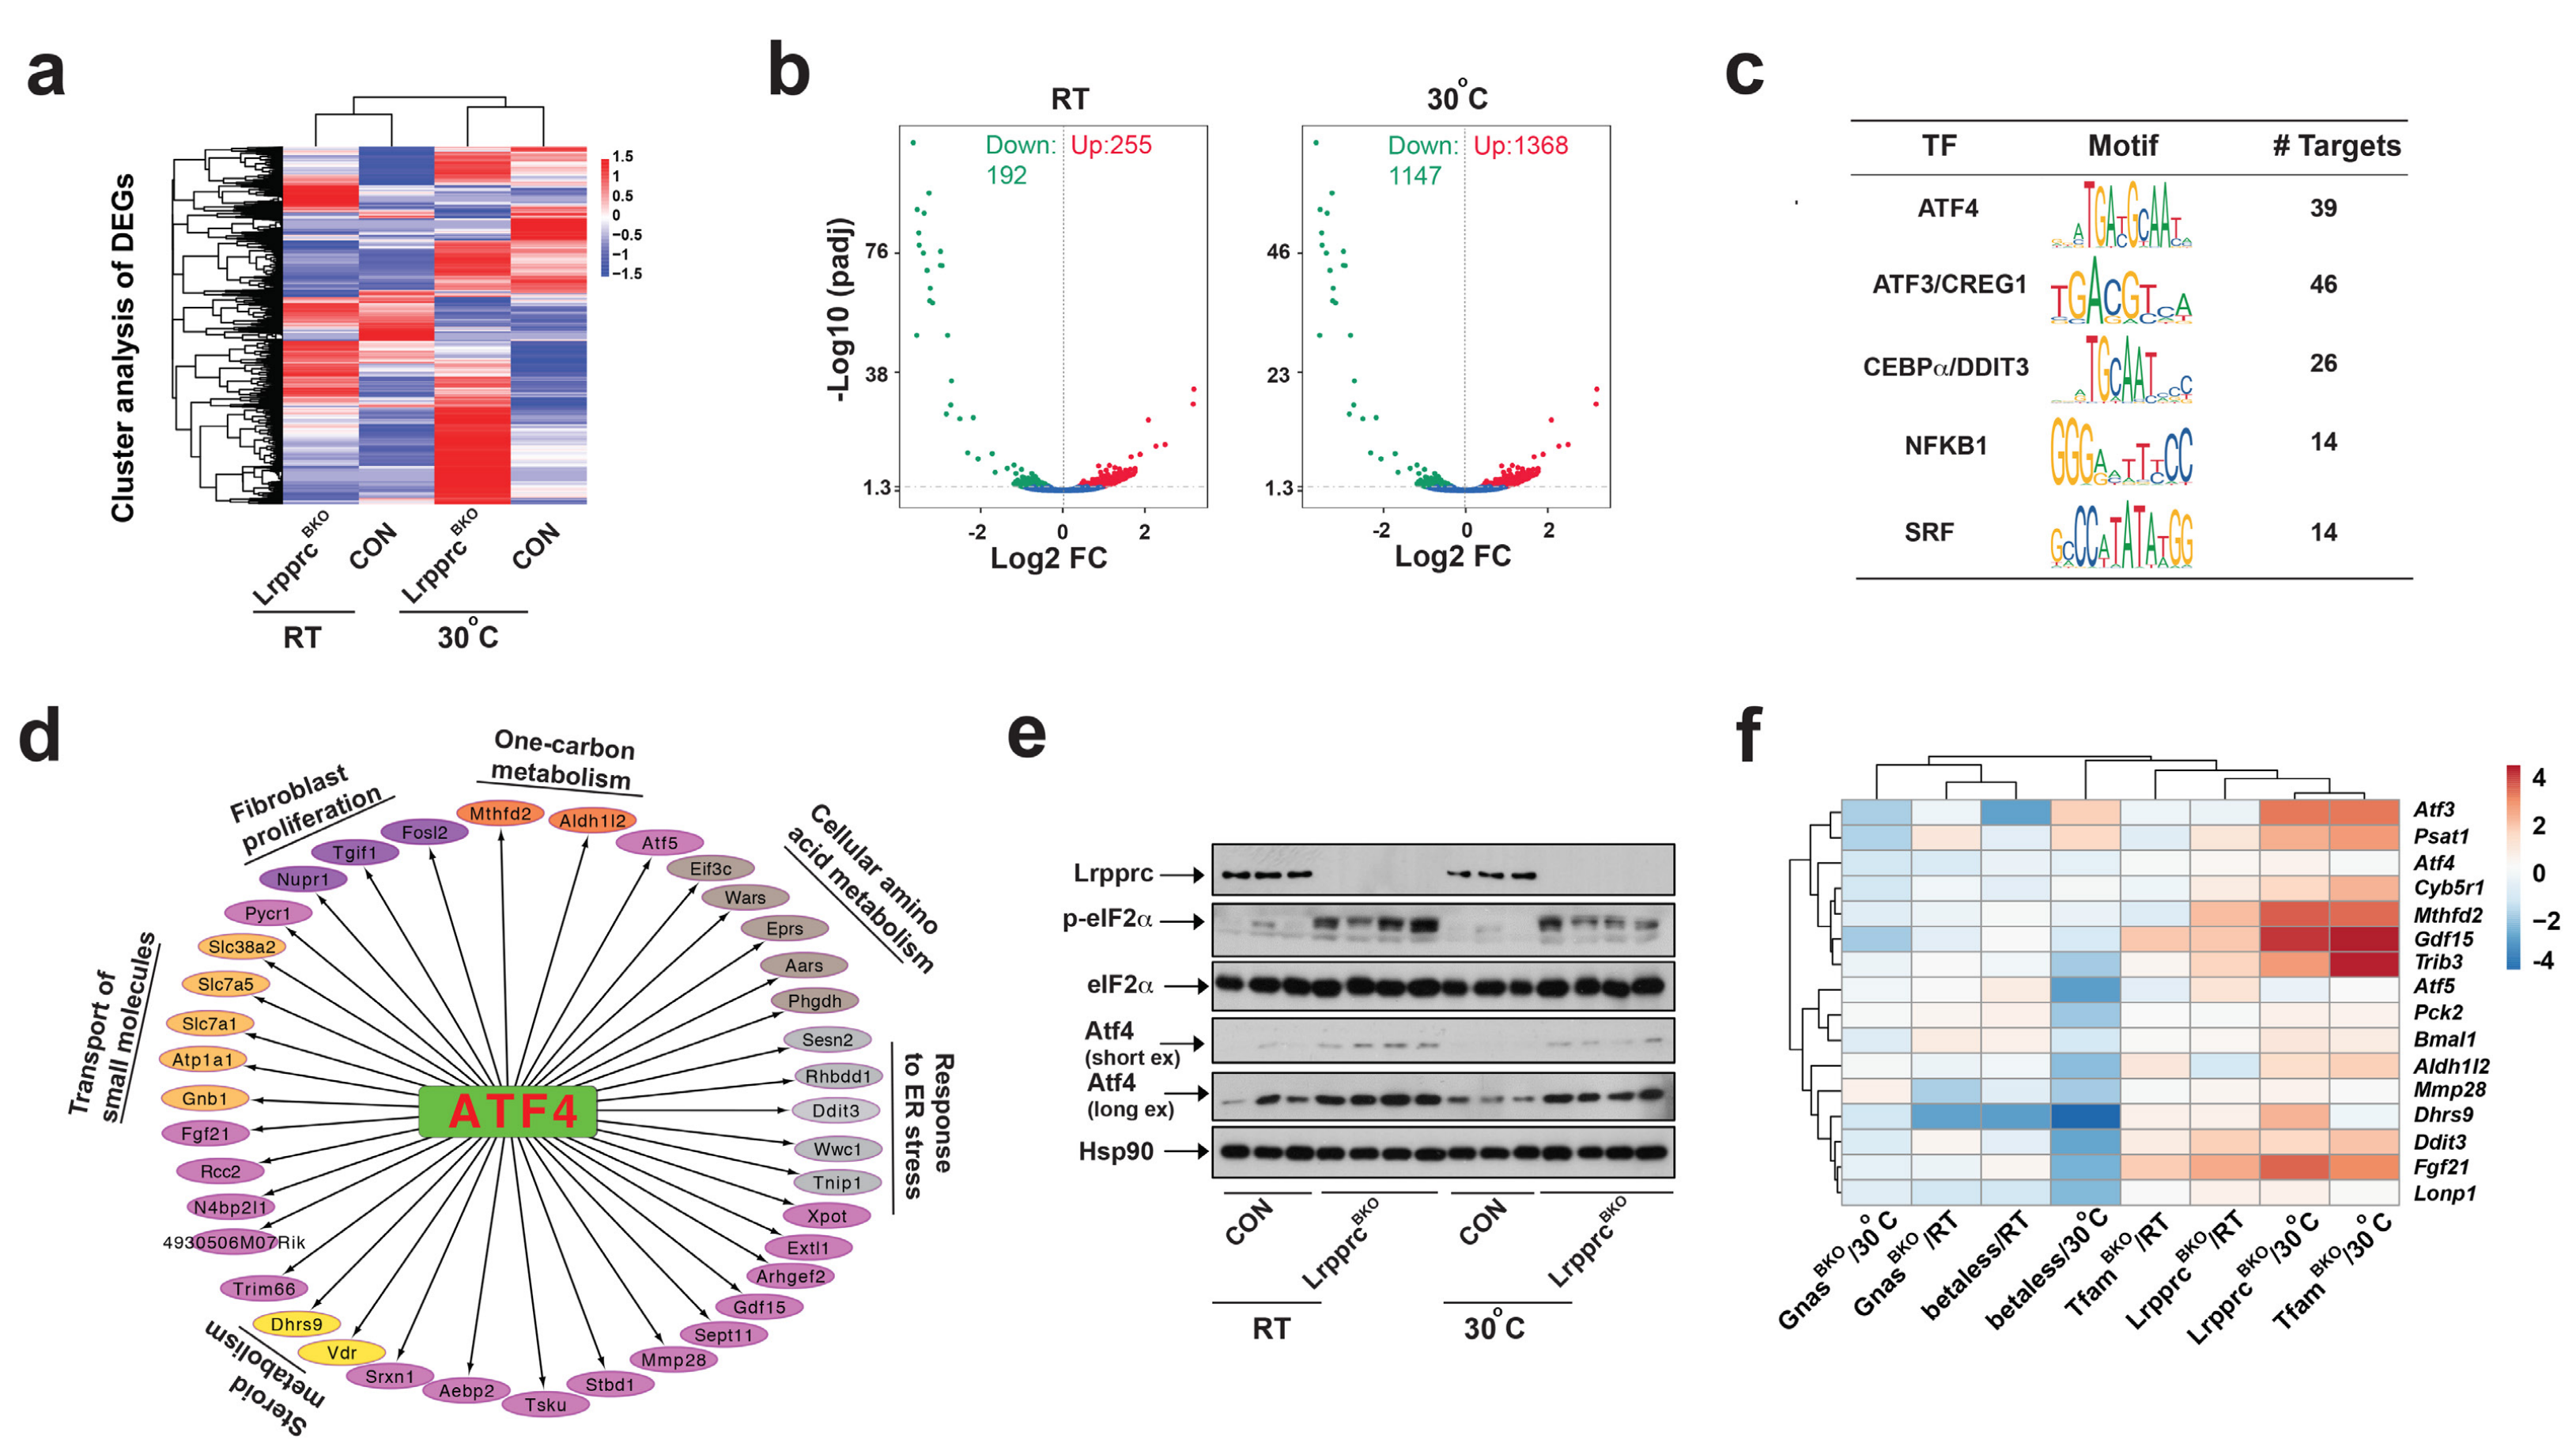

**Figure 2**

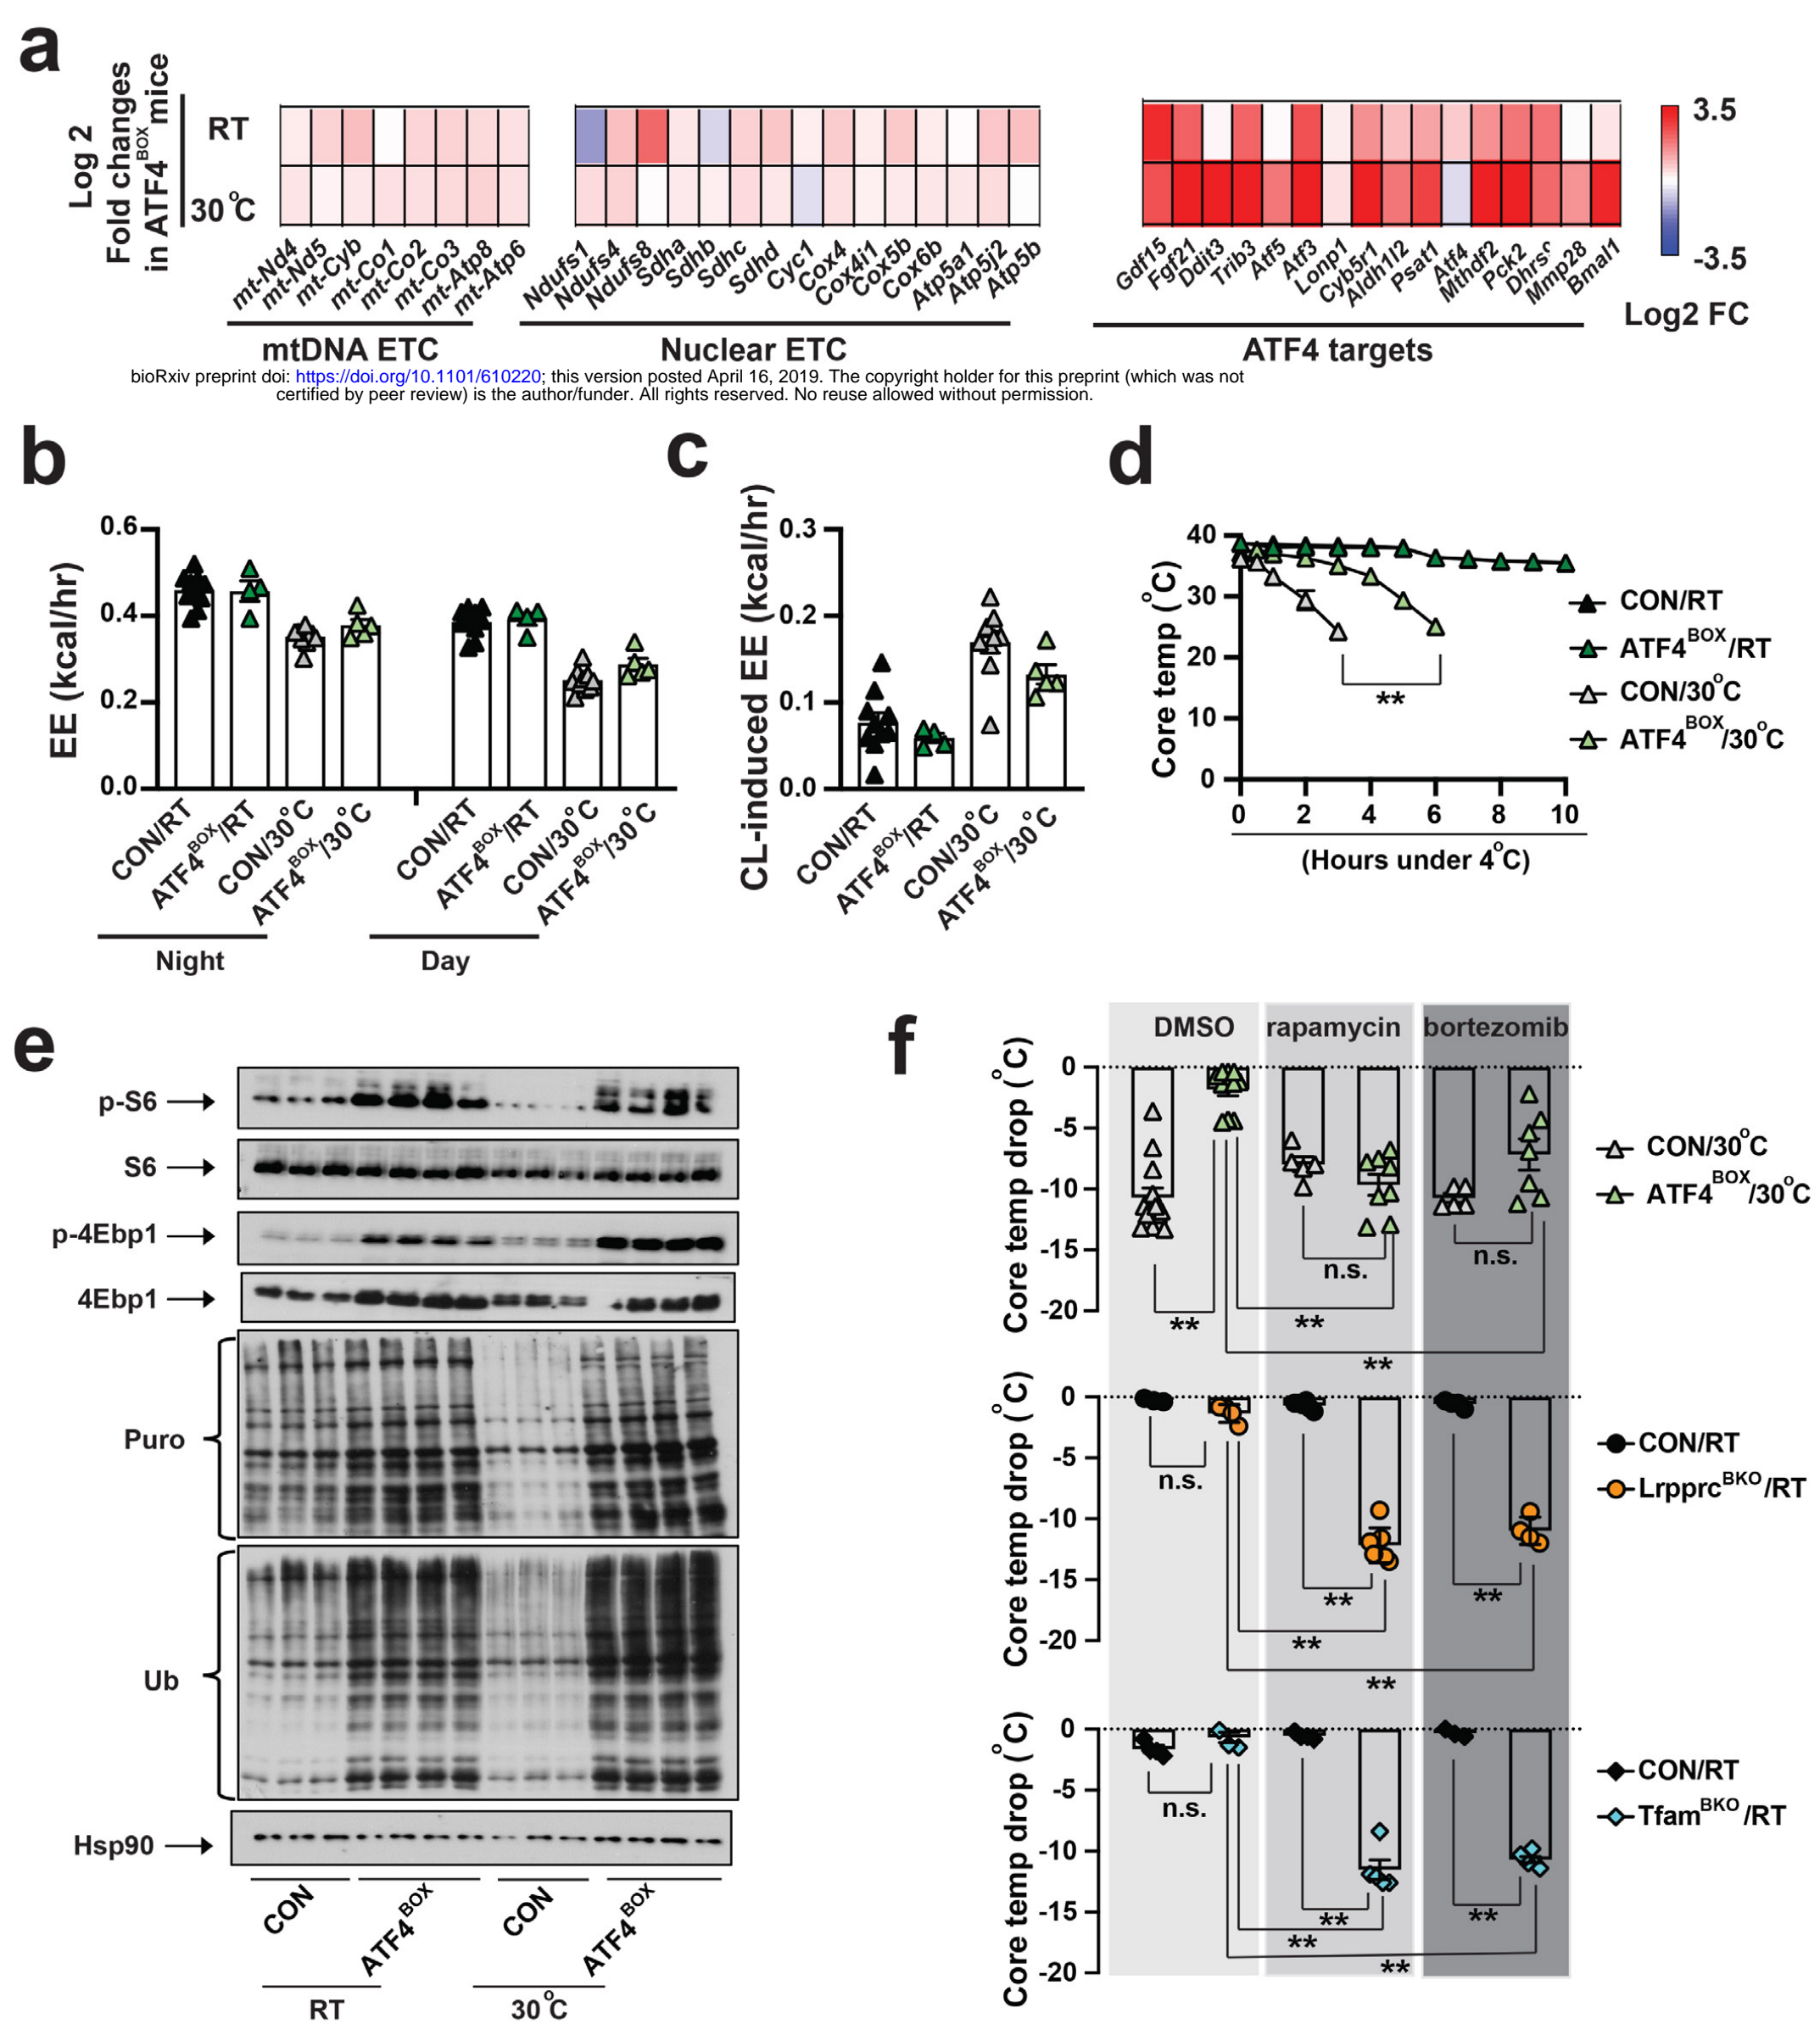

**Figure 3**

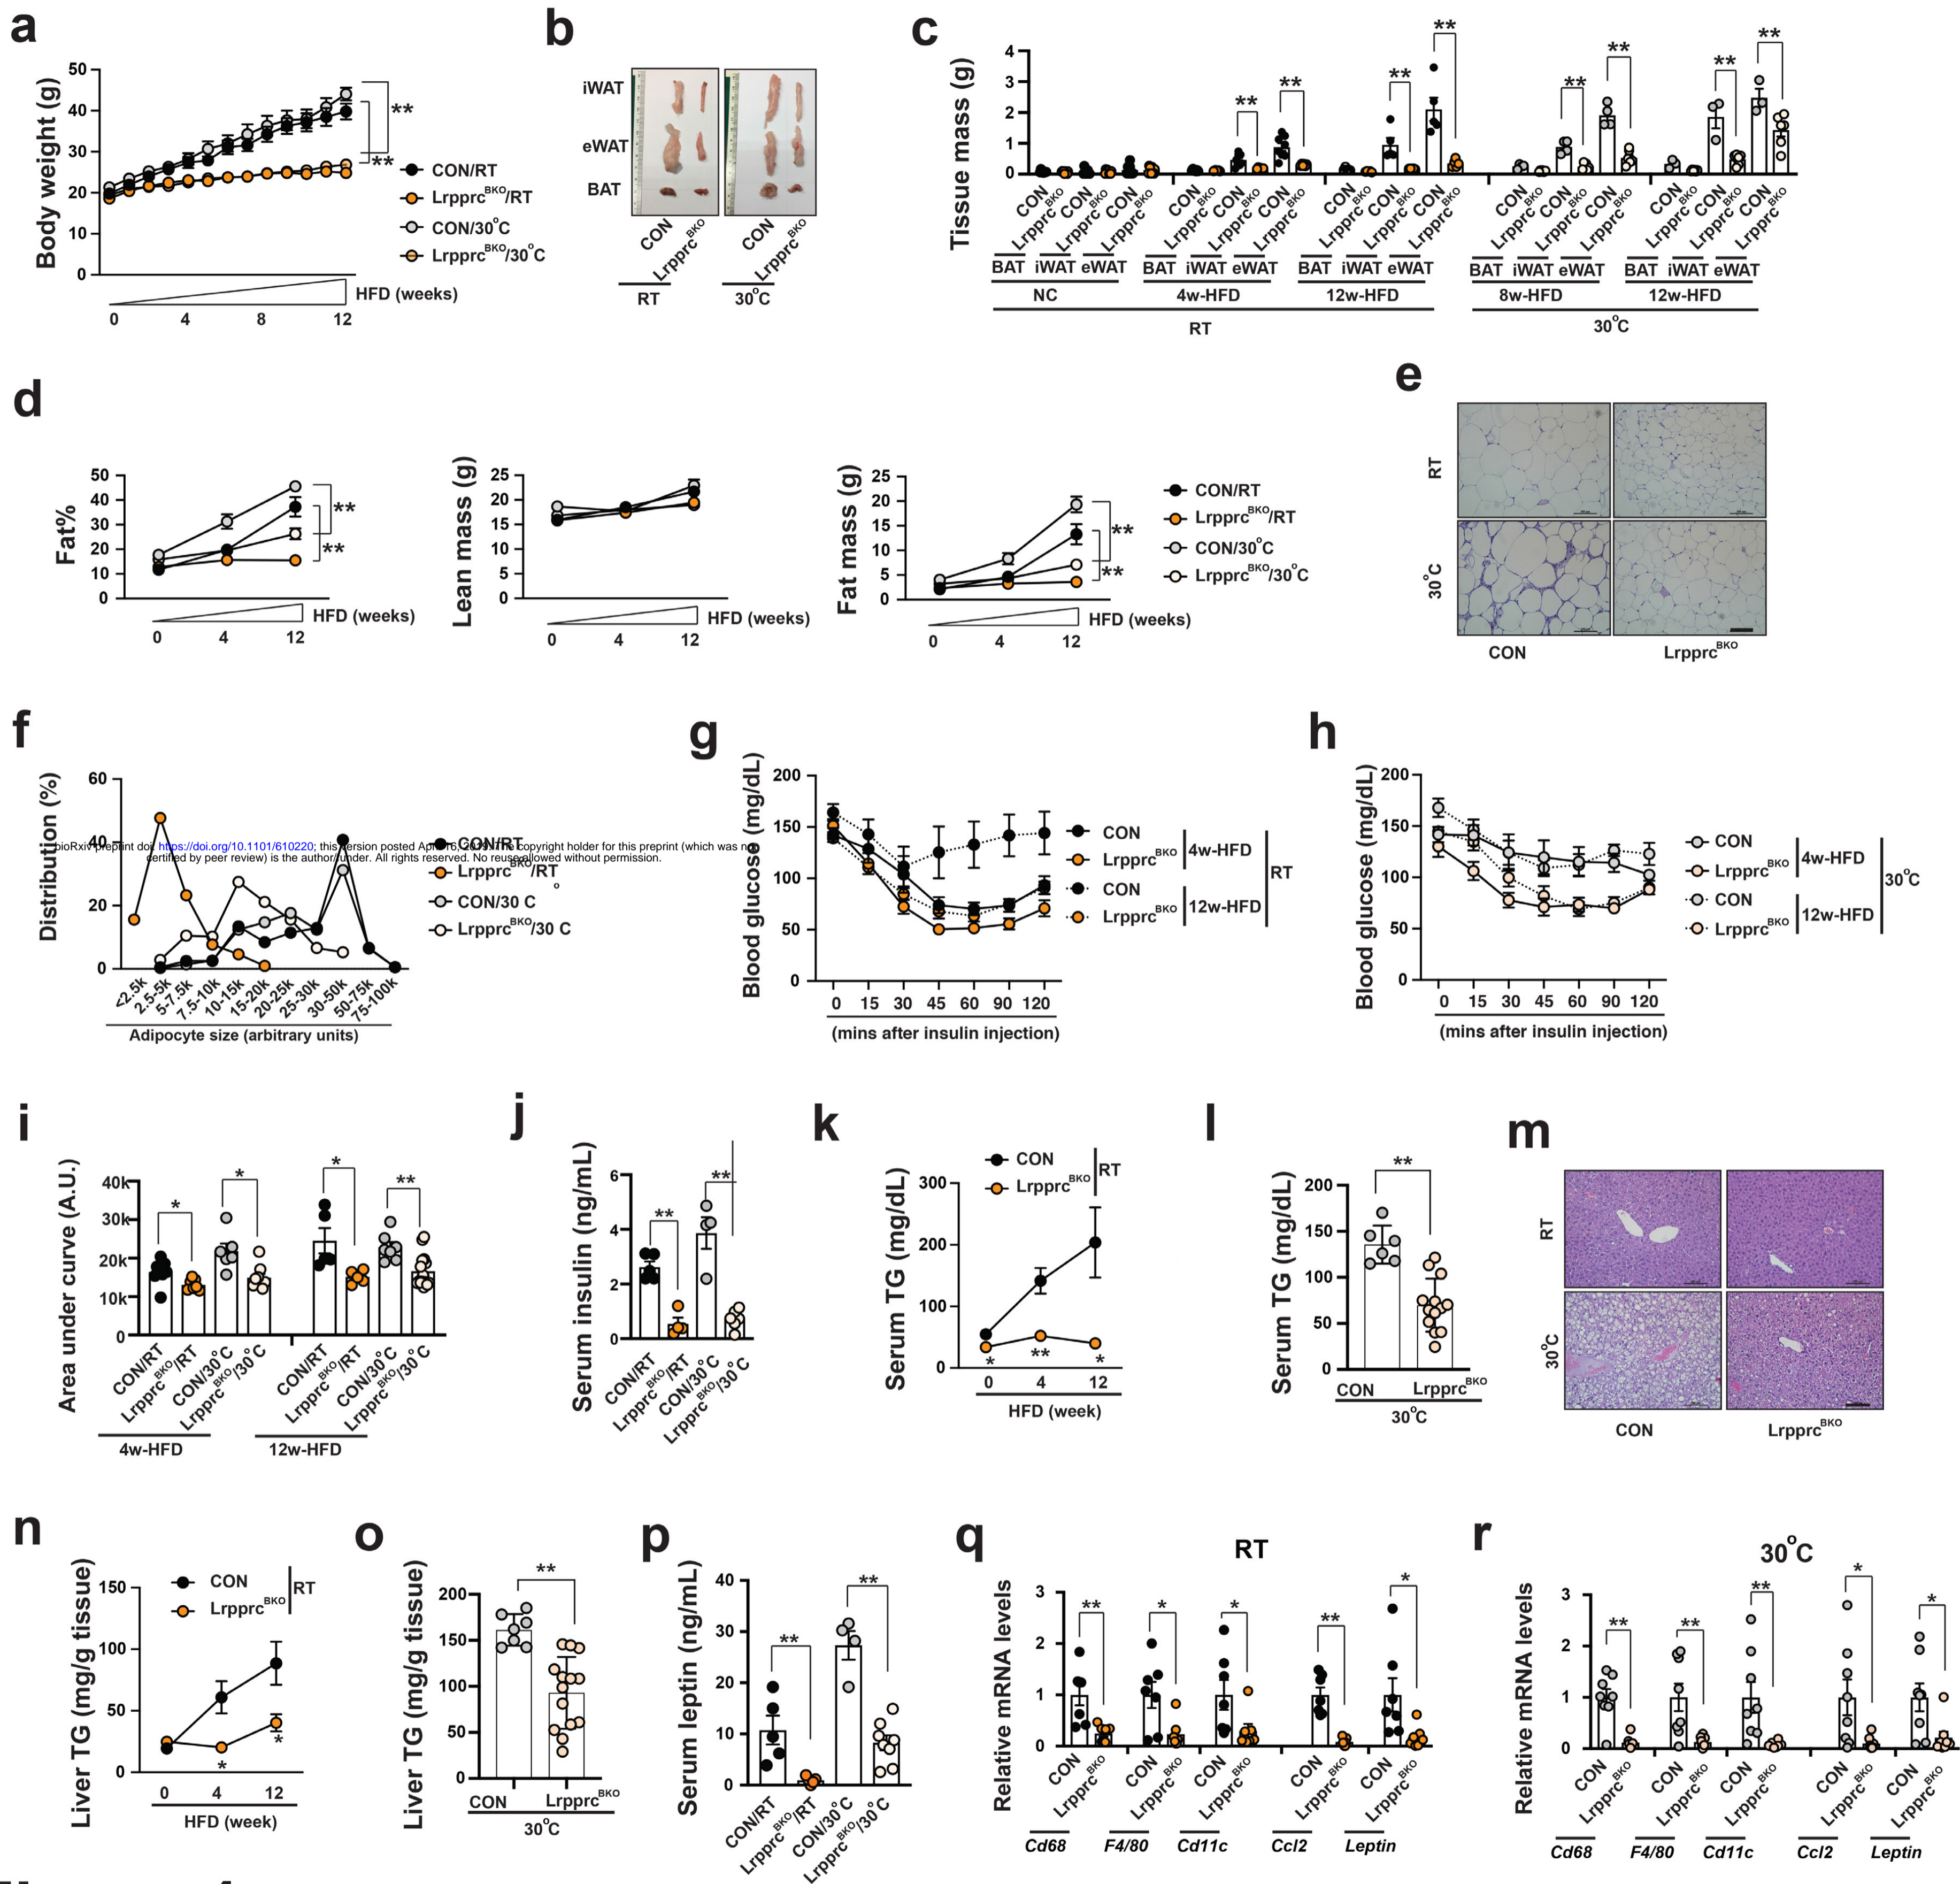

**Figure 4**

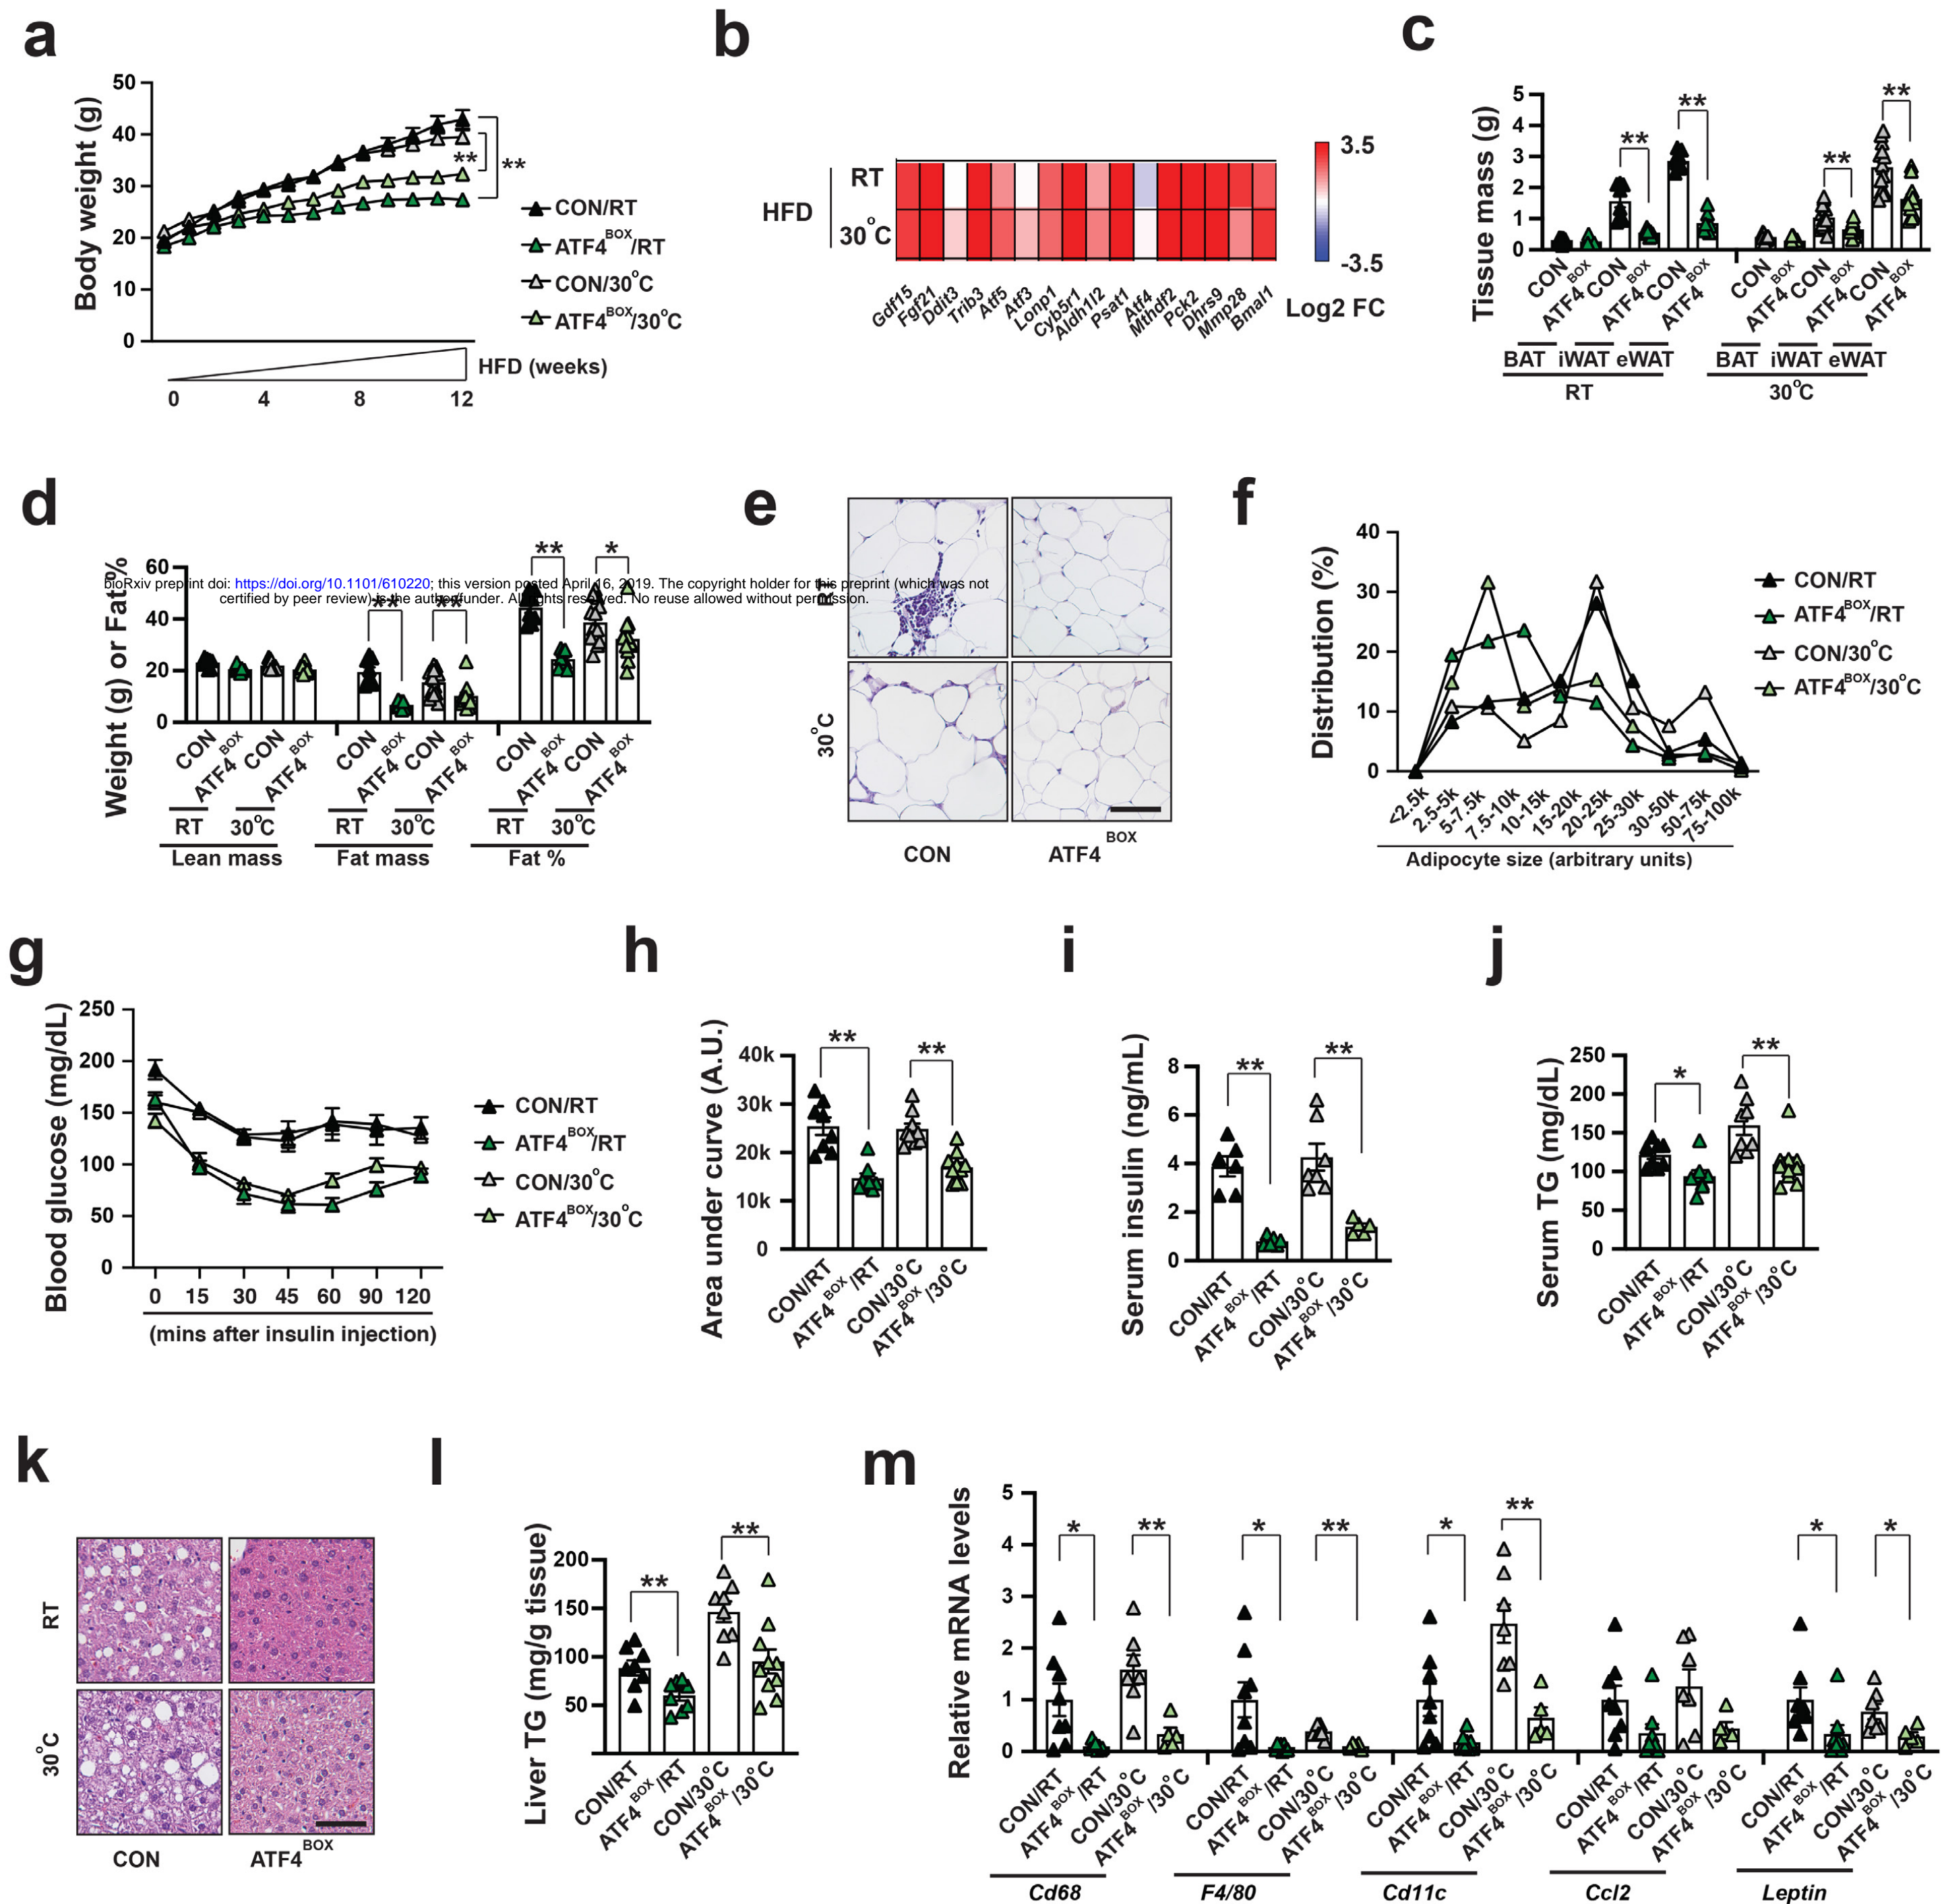

**Figure 5**



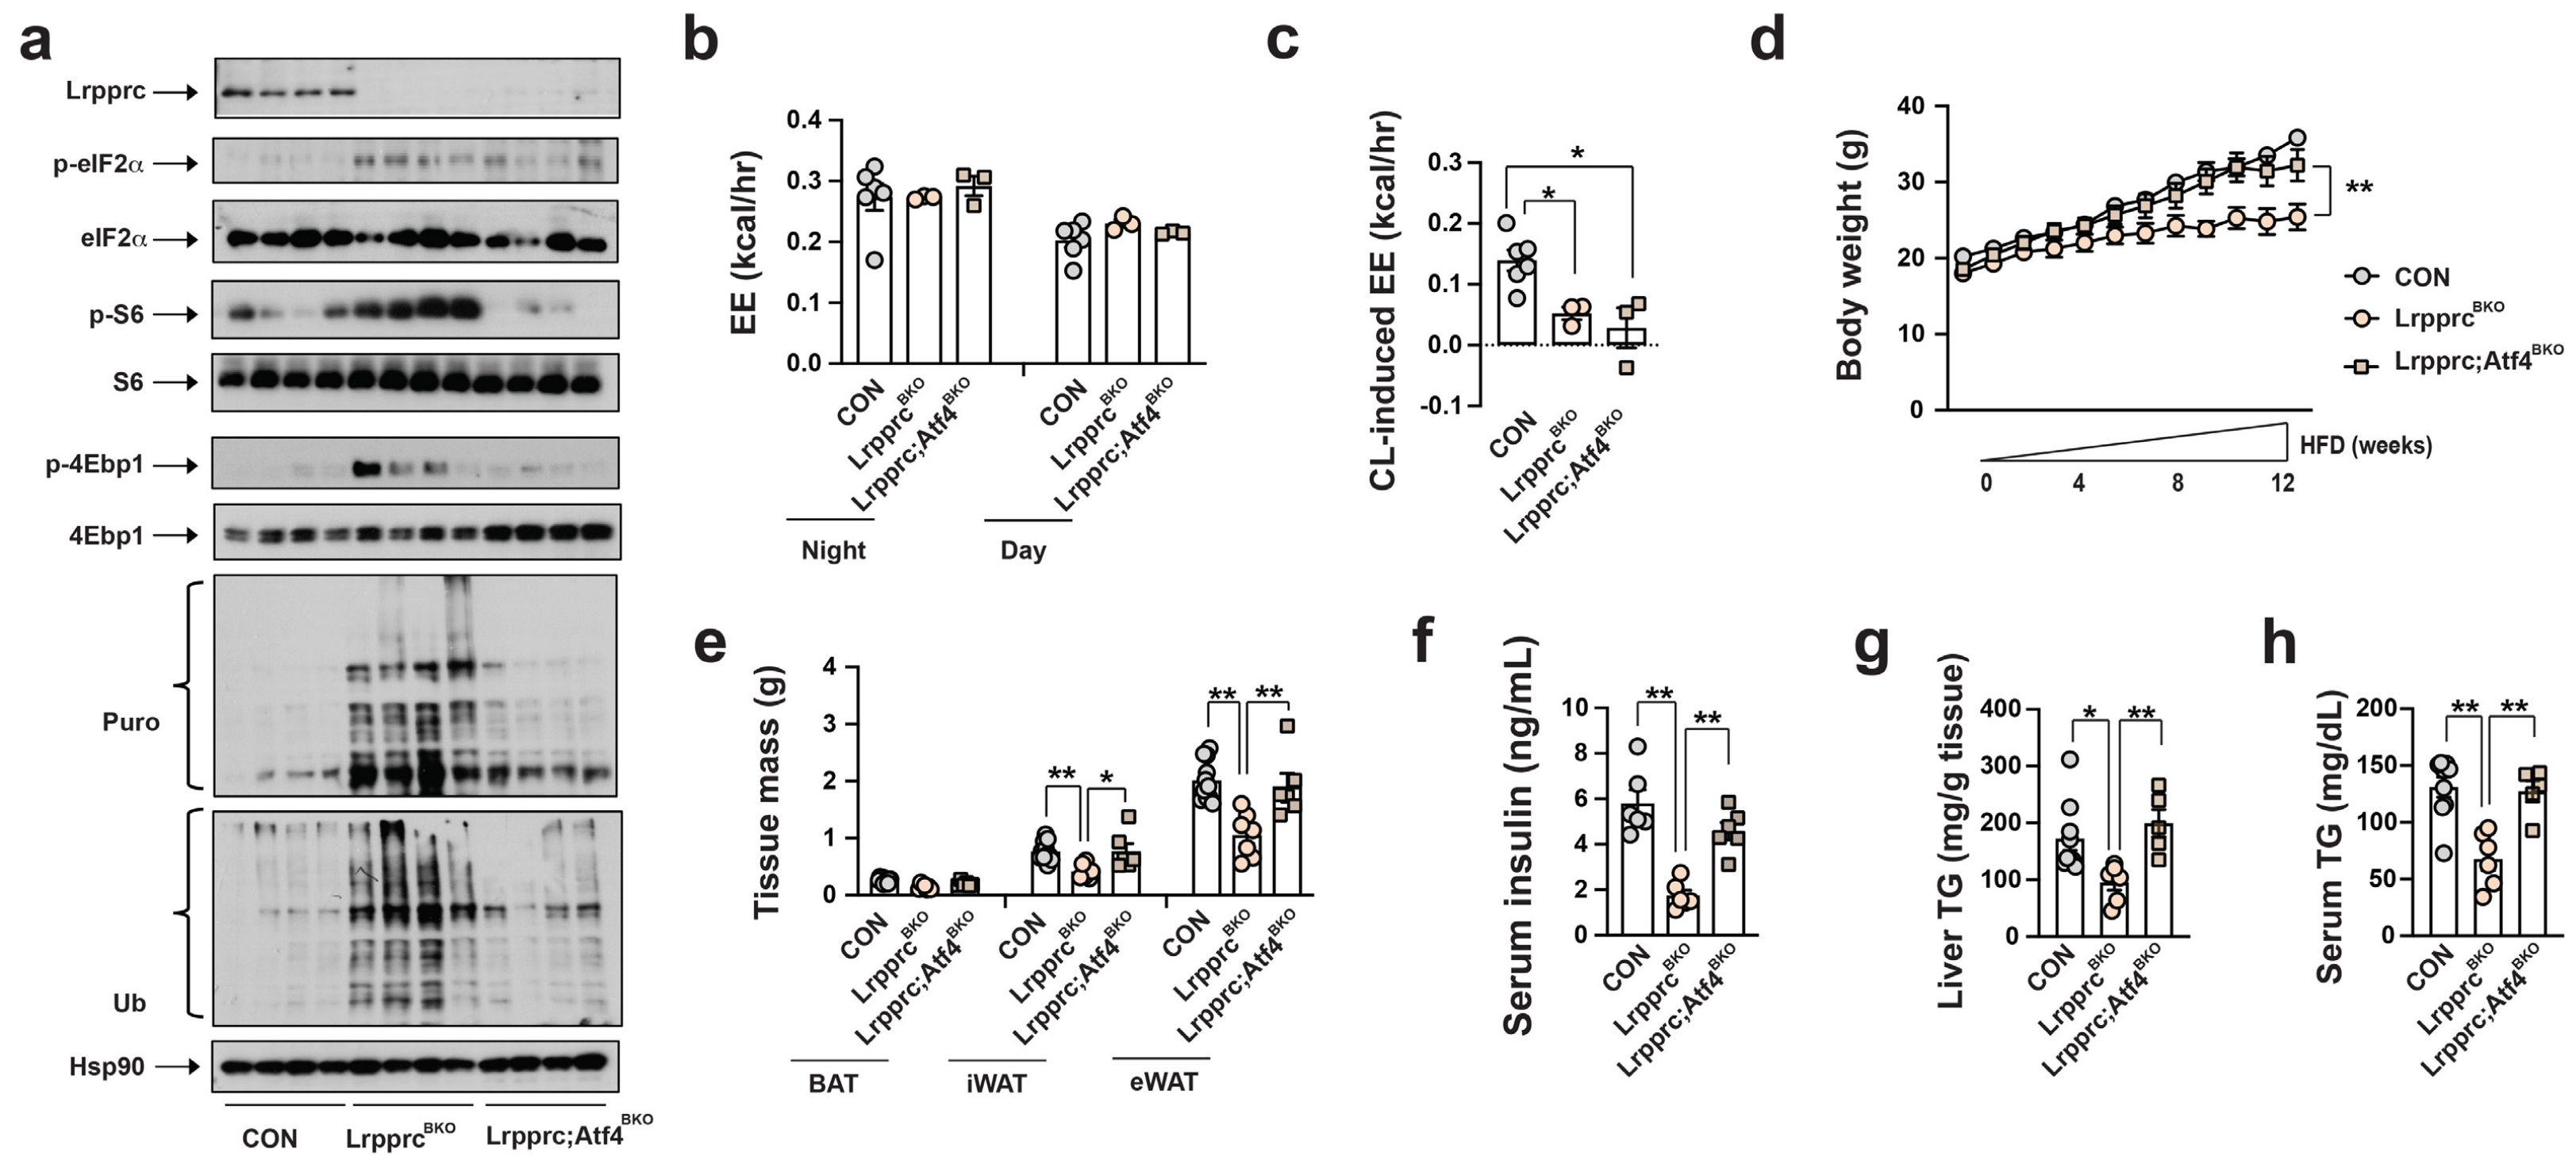

**Figure 6**
